# Supplementary material for: OCTOPUS: operation control system for task optimization and job parallelization via a user-optimal scheduler
Source: PubMed Central journal article supplement — Nat Commun. 2024 Nov 8;15:9669. doi: 10.1038/s41467-024-54067-7 (PMC11549402; doi:10.1038/s41467-024-54067-7), 2024-11-08
Supplement: 41467_2024_54067_MOESM1_ESM.pdf [file 41467_2024_54067_MOESM1_ESM.pdf]

Supplementary Information for

**OCTOPUS: Operation Control System for Task Optimization and Job Parallelization via a User-Optimal Scheduler**

Hyuk Jun Yoo,<sup>1,2</sup> Kwan-Young Lee,<sup>2\*</sup> Donghun Kim,<sup>1\*</sup> and Sang Soo Han<sup>1\*</sup>

<sup>1</sup>Computational Science Research Center, Korea Institute of Science and Technology, Seoul 02792, Republic of Korea

<sup>2</sup>Department of Chemical and Biological Engineering, Korea University, Seoul 02841, Republic of Korea

\*Correspondence to: sangsoo@kist.re.kr (S.S.H.); donghun@kist.re.kr (D.K.); kylee@korea.ac.kr (K.-Y.L.).

# Table of contents

|                                                                                                                |    |
|----------------------------------------------------------------------------------------------------------------|----|
| 1. Terminology definition in OCTOPUS.....                                                                      | 6  |
| Supplementary Figure S1. Definition of words .....                                                             | 6  |
| 2. Job submission via the interface node and job scheduler of the master node.....                             | 7  |
| Supplementary Figure S2. Detailed job script structure for manual and automated experimentations .....         | 7  |
| Supplementary Figure S2a. Job script for manual experimentations .....                                         | 7  |
| Supplementary Figure S2b. Job script for automated experimentations .....                                      | 8  |
| Supplementary Figure S3. Login process with Auth0 in the interface node of OCTOPUS                             | 10 |
| Supplementary Figure S4. Commands definitions for clients and administrators.....                              | 10 |
| Supplementary Figure S5. Workflow of job submission in job scheduler .....                                     | 11 |
| Supplementary Figure S6. Examples of job management via a command line interface                               | 12 |
| Supplementary Figure S6a. Command line interface examples of master node and module node initializations ..... | 12 |
| Supplementary Figure S6b. Command line interface examples of module node updates...                            | 13 |
| Supplementary Figure S6c. Command line interface examples of login process, job submission and job status..... | 14 |
| Supplementary Figure S6d. Command line interface examples of job submission, hold, restart and deletion .....  | 15 |
| 3. Job executions in the master node .....                                                                     | 16 |
| Supplementary Figure S7. Functions of the task generator .....                                                 | 16 |
| Supplementary Figure S7a. Detailed workflow of update device settings in resource manager .....                | 16 |
| Supplementary Figure S7b. Task reflection depending on latest device information .....                         | 17 |
| Supplementary Figure S7c. Detailed workflow of the task generator .....                                        | 17 |
| Supplementary Figure S7d. Examples of task templates.....                                                      | 18 |
| Supplementary Figure S7e. Conversion of job script in terms of task sequences in the task generator .....      | 20 |
| Supplementary Figure S8. Examples of resource allocation in batch synthesis module.                            | 21 |
| Supplementary Figure S9. The role of action translator for abstraction and digitalization                      | 21 |
| Supplementary Figure S10. Functions of the action executor .....                                               | 22 |
| Supplementary Figure S10a. Predefined device commands of the action executor .....                             | 22 |
| Supplementary Figure S10b. Detailed workflow of the action executor.....                                       | 22 |



|                                                                                                                                     |    |
|-------------------------------------------------------------------------------------------------------------------------------------|----|
| Supplementary Figure S11. Hierarchy structure of the generated material data .....                                                  | 23 |
| 4. Network-protocol-based modularization .....                                                                                      | 24 |
| Supplementary Figure S12. Process modularization for homogeneity via device server                                                  | 24 |
| Supplementary Figure S12a. An actual example of heterogeneous environments.....                                                     | 24 |
| Supplementary Figure S12b. Virtual workflow of the network protocol with a hierarchical structure.....                              | 25 |
| Supplementary Figure S13. Process modularization for scalability via internal and external network .....                            | 26 |
| Supplementary Figure S13a. Utilization of the internal network protocol in the routing table .....                                  | 26 |
| Supplementary Figure S13b. Virtual examples of scalable autonomous experiment platform based on internal and external network ..... | 27 |
| Supplementary Figure S14. Process modularization and utilization for safety. ....                                                   | 28 |
| Supplementary Figure S14a. Broadcast-enabled module node shutdown.....                                                              | 28 |
| Supplementary Figure S14b. Workflow of the safety alert system .....                                                                | 28 |
| Supplementary Figure S14c. Real messages of the alert system showing the experiment progress .....                                  | 29 |
| Supplementary Figure S14d. Real messages of the alert system for device disconnection via heartbeat.....                            | 29 |
| Supplementary Figure S14e. Real messages of the alert system via the restock function for chemical vessels.....                     | 29 |
| 5. Job parallelization to address the module overlap challenge.....                                                                 | 30 |
| Supplementary Figure S15. Schematic algorithm of job parallelization .....                                                          | 30 |
| Supplementary Figure S16. The timeline of the modules used for catalyst development included device standby time.....               | 31 |
| Supplementary Figure S17. Multiple jobs for catalyst application.....                                                               | 32 |
| Supplementary Figure S18. Definition of performance metrics .....                                                                   | 32 |
| Supplementary Table S1. Performance metrics of job parallelization .....                                                            | 33 |
| Supplementary Table 1a. Job waiting time between serialization and parallelization .....                                            | 33 |
| Supplementary Table 1b. Job turnaround time between serialization and parallelization. .                                            | 33 |
| Supplementary Table 1c. Job total time between serialization and parallelization. ....                                              | 33 |
| 6. Task optimization for preventing device overlaps.....                                                                            | 34 |
| Supplementary Figure S19. A bird's eye view image of modules including "BatchSynthesis" and "UV-Vis" .....                          | 34 |

|                                                                                              |    |
|----------------------------------------------------------------------------------------------|----|
| Supplementary Figure S20. Computing results of Boolean operation in python .....             | 34 |
| Supplementary Figure S21. Real examples of masking table.....                                | 35 |
| 7. The closed-packing schedule for optimizing module resource.....                           | 36 |
| Supplementary Figure S22. Definition of resource in realistic platform.....                  | 36 |
| Supplementary Figure S23. Detailed workflow of closed-packing schedule in multi jobs         | 37 |
| 8. Performance test of user-optimal schedulers .....                                         | 38 |
| Supplementary Figure S24. Schematic design of conventional scheduling algorithm (FCFS)       | 38 |
| Supplementary Figure S25. Job information for benchmark test of user-optimal schedulers      | 38 |
| Supplementary Figure S26. Residual resources-based job split via closed-packing schedule in  | 39 |
| user-optimal schedulers .....                                                                | 39 |
| Supplementary Table S2. Performance test in realistic platform .....                         | 40 |
| Supplementary Table 2a. Result of job waiting time in realistic platform .....               | 40 |
| Supplementary Table 2b. Result of job turnaround time in realistic platform .....            | 40 |
| Supplementary Table 2c. Result of job total time in realistic platform.....                  | 41 |
| Supplementary Figure S27. Results of closed packing schedule in UV-Vis module.....           | 42 |
| Supplementary Figure S28. Results of task optimization between batch synthesis and UV-Vis    | 43 |
| module.....                                                                                  | 43 |
| Supplementary Figure S29. Cause analysis for the delay time of CPS in batch synthesis module | 44 |
| .....                                                                                        | 44 |
| 9. Copilot of OCTOPUS.....                                                                   | 45 |
| Supplementary Figure S30. Reusability comparison with and without Copilot of OCTOPUS         | 45 |
| .....                                                                                        | 45 |
| Supplementary Table S3. The description of inputs and outputs of GPT .....                   | 46 |
| Supplementary Figure S31. Example of action generation for each device in module...          | 47 |
| Supplementary Figure S31a. GPT prompt example of action generation for each device in        | 47 |
| module.....                                                                                  | 47 |
| Supplementary Figure S31b. Example of generated actions for each device via GPT              | 47 |
| recommendation and client feedback.....                                                      | 47 |
| Supplementary Figure S32. Example of task generation for module .....                        | 48 |
| Supplementary Figure S32a. GPT prompt example of task generation for module.....             | 48 |
| Supplementary Figure S32b. Example for generated tasks via GPT recommendation and            | 48 |
| client feedback .....                                                                        | 48 |

|                                                                                                                                |    |
|--------------------------------------------------------------------------------------------------------------------------------|----|
| Supplementary Figure S33. Example of the action sequence generation for task execution                                         | 49 |
| .....                                                                                                                          | 49 |
| Supplementary Figure S33a. GPT prompt example of action sequence generation for task execution                                 | 49 |
| Supplementary Figure S33b. Example of generated action sequences for task execution via GPT recommendation and client feedback | 49 |
| Supplementary Figure S34. Example of task template and type validation generation                                              | 50 |
| Supplementary Figure S34a. Prompt engineering of task template generation for type validation using the OpenAI API             | 50 |
| .....                                                                                                                          | 50 |
| Supplementary Figure S34b. Prompt engineering of Pydantic class generation for type validation using the OpenAI API            | 51 |
| Supplementary Figure S34c. Example of generated task template and type validation for each task                                | 52 |
| Supplementary Table S4. The result of automated code generation/customization via Copilot of OCTOPUS                           | 53 |
| Supplementary References                                                                                                       | 55 |

# 1. Terminology definition in OCTOPUS

## Supplementary Figure S1. Definition of words

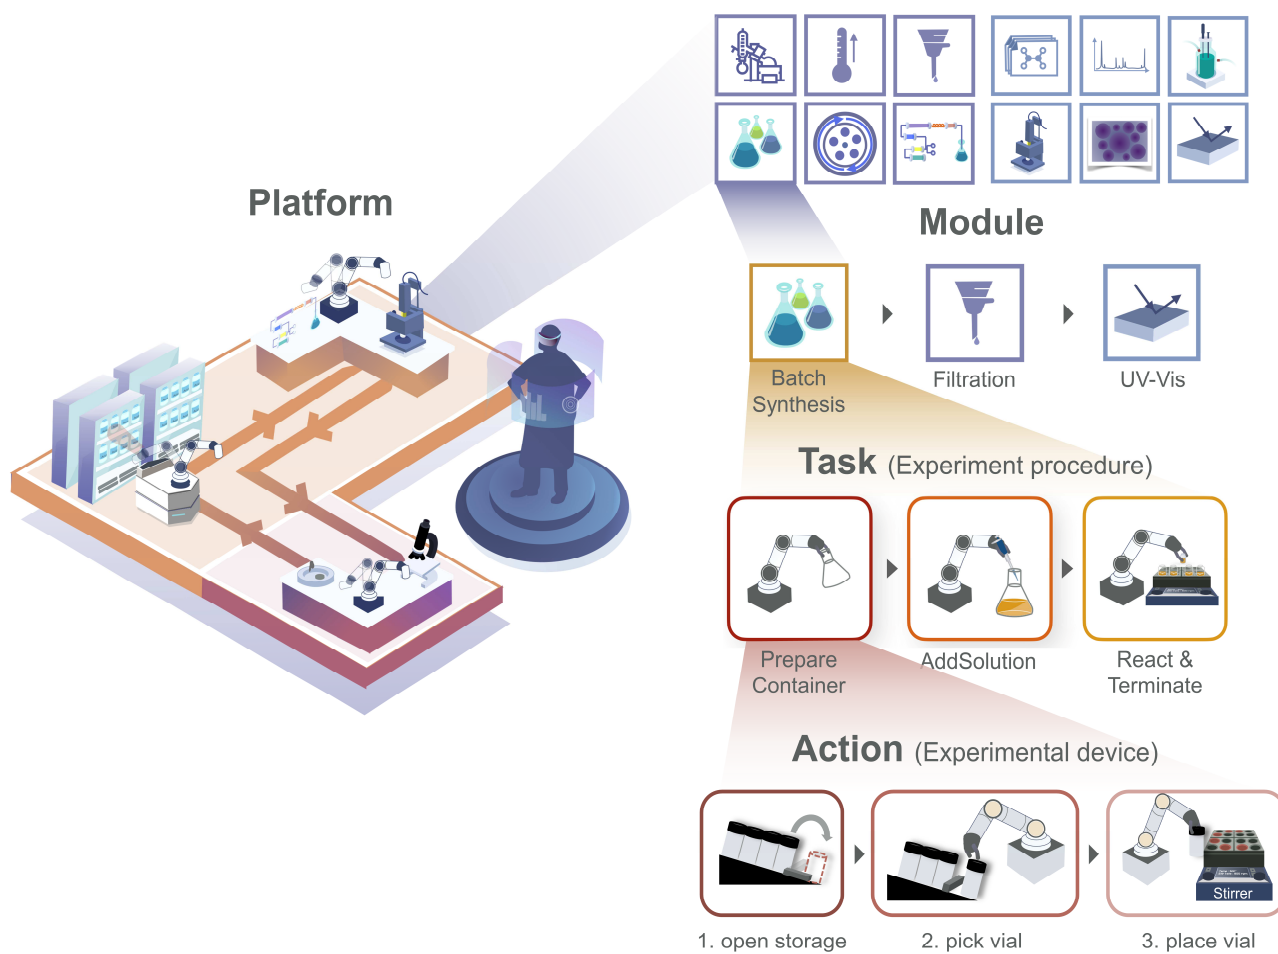

## 2. Job submission via the interface node and job scheduler of the master node

### Supplementary Figure S2. Detailed job script structure for manual and automated experimentations

The “metadata” key represents information about the experiments, including the subject, group name and log level. The “algorithm” key represents the process recommendation, including the model name, the total number of experiments and the model hyperparameters. The “process” key represents the experimental process information, including the module and task sequences and the fixed experimental conditions for each module.

#### Supplementary Figure S2a. Job script for manual experimentations

```
{
  "metadata" :
  {
    "subject": "Manual Experiment",
    "group": "KIST_CSRC",
    "LogLevel": "DEBUG"
  },
  "model":
  {
    "modelName": "Manual",
    "totalExperimentNum": 2,
    "inputParams": [
      {
        "AddSolution=AgNO3_Concentration" : 0.0125,
        "AddSolution=AgNO3_Volume" : 1000,
        "AddSolution=AgNO3_Injectionrate" : 100
      },
      {
        "AddSolution=AgNO3_Concentration" : 0.0175,
        "AddSolution=AgNO3_Volume" : 800,
        "AddSolution=AgNO3_Injectionrate" : 300
      }
    ]
  },
  "process":
  {
    "Synthesis": {
      "BatchSynthesis": {
        "Sequence": ["AddSolution_Citrate", "AddSolution_H2O2", "AddSolution_NaBH4", "Stir",
                    "Heat", "Mix", "AddSolution_AgNO3", "React"],
        "fixedParams":
        {
          "AddSolution=H2O2_Concentration" : 0.375,
          "AddSolution=H2O2_Volume" : 1100,
          "AddSolution=H2O2_Injectionrate" : 100,
          "AddSolution=Citrate_Concentration" : 0.04,
          "AddSolution=Citrate_Volume" : 1100,
          "AddSolution=Citrate_Injectionrate" : 100,
          "AddSolution=NaBH4_Concentration" : 0.01,
          "AddSolution=NaBH4_Volume" : 3000,
          "AddSolution=NaBH4_Injectionrate" : 100,

          "Stir=StirRate": 1000,
          "Heat=Temperature": 25,
          "Mix=Time": 300,
          "React=Time": 3600
        }
      }
    }
  }
}
```

```

    },
    "FlowSynthesis":{}
  },
  "Preprocess":{
    "Washing":{},
    "Ink":{}
  },
  "Characterization":{
    "UV":{}
  },
  "Evaluation":{
    "RDE":{},
    "Electrode":{}
  }
}
}
}

```

### Supplementary Figure S2b. Job script for automated experimentations

```

{
  "metadata" :
  {
    "subject": "Automated Experiment",
    "group": "KIST_CSRC",
    "LogLevel": "DEBUG"
  },
  "model":
  {
    "modelName": "BayesianOptimization",
    "batchSize": 6,
    "totalCycleNum": 3,
    "verbose": 0,
    "randomState": 0,
    "sampling": {
      "samplingMethod": "latin",
      "samplingNum": 20
    },
    "acq": {
      "acqMethod": "ucb",
      "acqSampler": "greedy",
      "acqHyperparameter": {
        "kappa": 10.0
      }
    },
    "Loss": {
      "LossMethod": "lambdamaxFWHMintensityLoss",
      "LossTarget": {
        "GetAbs": {
          "Property": {
            "Lambdamax": 573
          },
          "Ratio": {
            "Lambdamax": 0.9,
            "FWHM": 0.03,
            "intensity": 0.07
          }
        }
      }
    },
    "prange": {
      "AddSolution=AgNO3_Concentration" : [25, 375, 25],
      "AddSolution=AgNO3_Volume" : [100, 1200, 50],
      "AddSolution=AgNO3_Injectionrate" : [50, 200, 50]
    },
    "initParameterList": [],

```

```

    "constraints":[]
  },
  "process":
  {
    "Synthesis":{
      "BatchSynthesis":
      {
        "Sequence":["AddSolution_Citrate","AddSolution_H2O2","AddSolution_NaBH4",
          "Stir","Heat","Mix", "AddSolution_AgNO3", "React"],
        "fixedParams":
        {
          "AddSolution=AgNO3_Concentration" : 1250,
          "AddSolution=H2O2_Concentration" : 375,
          "AddSolution=H2O2_Volume" : 1200,
          "AddSolution=H2O2_Injectionrate" : 200,
          "AddSolution=Citrate_Concentration" : 20,
          "AddSolution=Citrate_Volume" : 1200,
          "AddSolution=Citrate_Injectionrate" : 200,
          "AddSolution=NaBH4_Concentration" : 10,
          "AddSolution=NaBH4_Volume" : 3000,
          "AddSolution=NaBH4_Injectionrate" : 200,

          "Stir=StirRate":1000,
          "Heat=Temperature":25,
          "Mix=Time":300,
          "React=Time":7200
        }
      },
      "FlowSynthesis":{}
    },
    "Preprocess":{
      "Washing":{},
      "Ink":{}
    },
    "Characterization":{
      "UV-Vis":
      {
        "Sequence":["GetAbs"],
        "fixedParams":
        {
          "UV=Hyperparameter_WavelengthMin":300,
          "UV=Hyperparameter_WavelengthMax":849,
          "UV=Hyperparameter_BoxCarSize":10,
          "UV=Hyperparameter_Prominence":0.01,
          "UV=Hyperparameter_PeakWidth":20
        }
      }
    },
    "Evaluation":{
      "RDE":{},
      "Electrode":{}
    }
  }
}

```

Examples of job scripts for manual and automated experiments. The job script is based on the JSON (JavaScript Object Notation) format. Other job script formats were uploaded to the GitHub repository. (<https://github.com/KIST-CSRC/Octopus>)

## Supplementary Figure S3. Login process with Auth0 in the interface node of OCTOPUS

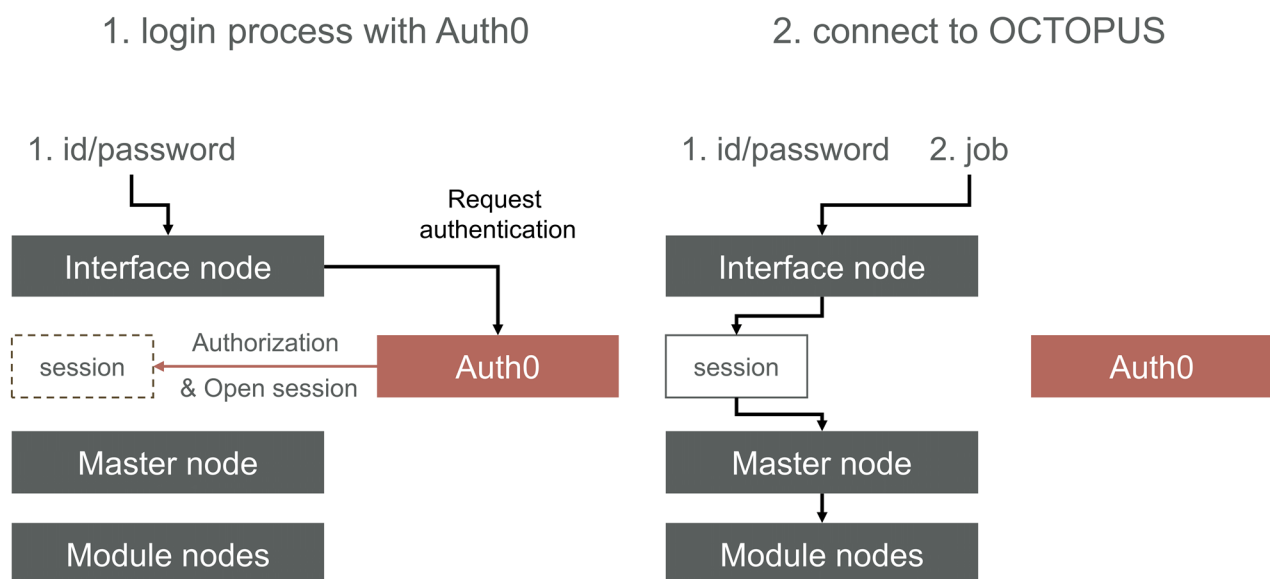

## Supplementary Figure S4. Commands definitions for clients and administrators

| <b>Command</b>                    | <b>Description</b>                                                         | <b>Example</b>                                   |
|-----------------------------------|----------------------------------------------------------------------------|--------------------------------------------------|
| qstat                             | (Client) Monitor job in whole queue                                        | qstat                                            |
| qsub <jobscript filename> <mode>  | (Client) submit job script file to server                                  | qsub synthesis_test virtual<br>qsub UV_test real |
| qdel <job ID>                     | (Client) delete job in hold queue                                          | qdel 0                                           |
| qhold <job ID>                    | (Client) hold job in execution queue                                       | qhold 0                                          |
| qrestart <job ID>                 | (Client) restart job in hold queue                                         | qrestart 0                                       |
| qlogout                           | (Administrator) logout from server                                         | qlogout                                          |
| ashutdown <module name or "all">  | (Administrator) shutdown module node or all of it                          | ashutdown UV<br>ashutdown BatchSynthesis         |
| areboot <module name or "all">    | (Administrator) reboot module node or all of it                            | areboot UV<br>areboot all                        |
| updateNode <module name or "all"> | (Administrator) update module node for the newest physical device settings | updateNode BatchSynthesis                        |



**Supplementary Figure S5. Workflow of job submission in job scheduler**

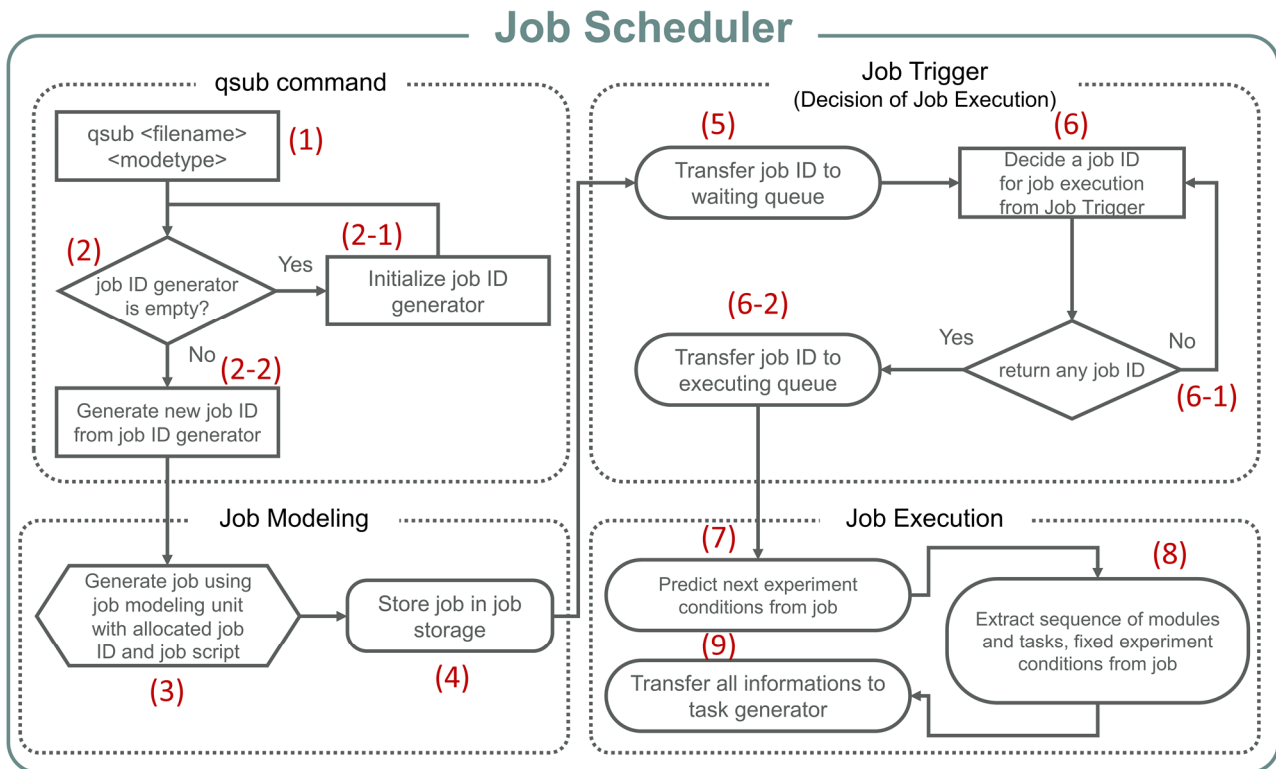

## Supplementary Figure S6. Examples of job management via a command line interface

### Supplementary Figure S6a. Command line interface examples of master node and module node initializations

(Module, BatchSynthesis) Module node on → heartbeat & update device information

```
[BatchSynthesis] Waiting...
[Emergency Stop] Waiting...
2023-10-05 19:15:23,577 - BatchSynthesis::INFO -- [BatchSynthesis] : packet information list:['info', 'BATCH', 'None', 'all', 'virtual']
2023-10-05 19:15:23,911 - BatchSynthesis::DEBUG -- [IKA_RET_0 (heartbeat)] : Hello World!! Succeed to connection to main computer!
2023-10-05 19:15:25,631 - BatchSynthesis::DEBUG -- [PUMP (heartbeat)] : [PUMP] heartbeat action success
2023-10-05 19:15:26,699 - BatchSynthesis::DEBUG -- [DS_B (heartbeat)] : [DS_B] heartbeat action success
2023-10-05 19:15:27,821 - BatchSynthesis::DEBUG -- [PIPETTE (heartbeat)] : [PIPETTE] heartbeat action success
2023-10-05 19:15:28,938 - BatchSynthesis::DEBUG -- [Science_town (heartbeat)] : Hello World!! Succeed to connection to Linear Actuator computer!
2023-10-05 19:15:31,005 - BatchSynthesis::DEBUG -- [VialStorage (heartbeat)] : Hello World!! Succeed to connection to main computer!
2023-10-05 19:15:31,020 - BatchSynthesis::DEBUG -- [Module Node (BatchSynthesis)] : {'Stirrer': {'Stirrer_0': {'Port': 'COM5', 'DeviceName': 'IKA_RET_0', 'Temperature': 25}}, 'Pump': {'AgNO3': {'SolutionType': 'Metal', 'PumpAddress': 1, 'PumpUsbAddr': '/dev/ttyPUMP2', 'Resolution': 1814000, 'Concentration': 0.0125, 'SyringeVolume': 5000, 'DeviceName': 'CavroCentris'}, 'H2O': {'SolutionType': 'Solvent', 'PumpAddress': 0, 'PumpUsbAddr': '/dev/ttyPUMP0', 'Resolution': 1814000, 'Concentration': 0, 'SyringeVolume': 5000, 'DeviceName': 'CavroCentris'}, 'NaBH4': {'SolutionType': 'Reductant', 'PumpAddress': 2, 'PumpUsbAddr': '/dev/ttyPUMP2', 'Resolution': 1814000, 'Concentration': 0.01, 'SyringeVolume': 5000, 'DeviceName': 'CavroCentris'}, 'H2O2': {'SolutionType': 'Oxidant', 'PumpAddress': 3, 'PumpUsbAddr': '/dev/ttyPUMP1', 'Resolution': 1814000, 'Concentration': 0.375, 'Density': 1.45, 'MolarMass': 34.0147, 'SyringeVolume': 5000, 'DeviceName': 'CavroCentris'}, 'Citrate': {'SolutionType': 'CA', 'PumpAddress': 4, 'PumpUsbAddr': '/dev/ttyPUMP1', 'Resolution': 1814000, 'Concentration': 0.04, 'SyringeVolume': 5000, 'DeviceName': 'CavroCentris'}}, 'DS_B': {'Id': 'dsr01', 'Model': 'm0609', 'NETWORK': '192.168.137.100', 'WorkRange': 900}, 'Pipette': {'PVP': {'SolutionType': 'Surfactant', 'PumpUsbAddr': '/dev/ttyUSB0', 'DeviceName': 'Dynamixel'}}, 'LinearActuator': {'Stirrer_location_list': [{'x': 807000, 'y': 305420}, {'x': 716240, 'y': 305420}, {'x': 877030, 'y': 375370}, {'x': 647830, 'y': 375370}, {'x': 877030, 'y': 465330}, {'x': 647830, 'y': 465330}, {'x': 807190, 'y': 534460}, {'x': 716240, 'y': 534460}], 'move_z': {'up': 125000, 'down': 150000}, 'Center_location_list': {'x': 450000, 'y': 0, 'z': 125000}}, 'VialStorage': {'DeviceName': 'VialStorage', 'Port': 'COM3', 'BaudRate': 9600}}
```

(Module, UV-Vis) Module node on → heartbeat & update device information

```
[UV] Waiting...
[Emergency Stop] Waiting...
2023-09-24 22:21:35,189 - UV-Vis::INFO -- [UV] : packet information list:['info', 'UV', 'None', 'all', 'virtual']
Send : b'heartbeat,status'
2023-09-24 22:21:37,195 - UV-Vis::DEBUG -- [USB2000plus (heartbeat)] : Hello World!! Succeed to connection to main computer!
2023-09-24 22:21:37,197 - UV-Vis::DEBUG -- [Module Node (UV-Vis)] : {'Spectrometer': {'DeviceName': 'USB2000+', 'DetectionRange': '200-850nm', 'Solvent': {'Solution': 'H2O', 'Value': 2000, 'Dimension': 'µL'}}, 'LightSource': {'DeviceName': 'DH-2000-BAL', 'DetectionRange': '210-2500nm', 'Lamp': 'deuterium(25W) and halogen lamps(20W)'}}
```

(Master) Master node on → Resource manager send heartbeat & update device information from modules

```
2023-09-24 22:03:04,142 - JobServer::INFO -- [ResourceManager] : receive information of BatchSynthesis
2023-09-24 22:03:10,169 - JobServer::INFO -- [ResourceManager] : receive information of UV-Vis
[JobServer] Server on at :5555.
[JobServer] Waiting...
```

When the master node is executed, it sends a heartbeat to the activated module nodes to check their connectivity. If all module nodes are successfully connected, the resource manager retrieves the device information from each module node. In the two examples mentioned above, this information includes the experimental device information associated with each module node.

## Supplementary Figure S6b. Command line interface examples of module node updates

### (Client) Update device information from all modules

```
input commands (if terminate: input 'qlogout'): updateNode
2023-10-05 19:30:20,738 - JobClient::INFO -- [HJ] : request to update Node Server
2023-10-05 19:30:38,178 - JobClient::INFO -- [HJ] : succeed to update module node information: {'BatchSynthesis': {'Stirrer': {'Stirrer_0': {'Port': 'COM5', 'DeviceName': 'IKA_RET_0', 'Temperature': 25}}, 'Pump': {'AgNO3': {'SolutionType': 'Metal', 'PumpAddress': 1, 'PumpUsbAddr': '/dev/ttyPUMP2', 'Resolution': 1814000, 'Concentration': 0.0125, 'SyringeVolume': 5000, 'DeviceName': 'CavroCentris'}, 'H2O': {'SolutionType': 'Solvent', 'PumpAddress': 0, 'PumpUsbAddr': '/dev/ttyPUMP0', 'Resolution': 1814000, 'Concentration': 0, 'SyringeVolume': 5000, 'Connection': {'H2O': 5, 'AgNO3': 6, 'NaBH4': 7, 'H2O2': 8, 'Citrate': 9}, 'DeviceName': 'CavroCentris'}, 'NaBH4': {'SolutionType': 'Reductant', 'PumpAddress': 2, 'PumpUsbAddr': '/dev/ttyPUMP2', 'Resolution': 1814000, 'Concentration': 0.01, 'SyringeVolume': 5000, 'DeviceName': 'CavroCentris'}, 'H2O2': {'SolutionType': 'Oxidant', 'PumpAddress': 3, 'PumpUsbAddr': '/dev/ttyPUMP1', 'Resolution': 1814000, 'Concentration': 0.375, 'Density': 1.45, 'MolarMass': 34.0147, 'SyringeVolume': 5000, 'DeviceName': 'CavroCentris'}, 'Citrate': {'SolutionType': 'CA', 'PumpAddress': 4, 'PumpUsbAddr': '/dev/ttyPUMP1', 'Resolution': 1814000, 'Concentration': 0.04, 'SyringeVolume': 5000, 'DeviceName': 'CavroCentris'}}, 'DS_B': {'Id': 'dsr01', 'Model': 'm0609', 'NETWORK': '192.168.137.100', 'WorkRange': 900}, 'Pipette': {'PVP': {'SolutionType': 'Surfactant', 'PumpUsbAddr': '/dev/ttyUSB0', 'DeviceName': 'Dynamixel'}}, 'LinearActuator': {'Stirrer_location_list': [{'x': 807000, 'y': 305420}, {'x': 716240, 'y': 305420}, {'x': 877030, 'y': 375370}, {'x': 647830, 'y': 375370}, {'x': 877030, 'y': 465330}, {'x': 647830, 'y': 465330}, {'x': 807190, 'y': 534460}, {'x': 716240, 'y': 534460}], 'move_z': {'up': 125000, 'down': 150000}, 'Center_location_list': {'x': 450000, 'y': 0, 'z': 125000}}, 'VialStorage': {'DeviceName': 'VialStorage', 'Port': 'COM3', 'BaudRate': 9600}}, 'UV': {'Spectrometer': {'DeviceName': 'USB2000+', 'DetectionRange': '200-850nm', 'Solvent': {'Solution': 'H2O', 'Value': 2000, 'Dimension': 'µL'}}, 'LightSource': {'DeviceName': 'DH-2000-BAL', 'DetectionRange': '210-2500nm', 'Lamp': 'deuterium(25W) and halogen lamps(20W)'}}
```

### (Module, BatchSynthesis) Resend heartbeat & update new device information & transfer that information to Master

```
2023-10-05 19:30:22,244 - BatchSynthesis::INFO -- [BatchSynthesis] : packet information list:['info', 'BATCH', 'None', 'all', 'virtual']
2023-10-05 19:30:22,524 - BatchSynthesis::DEBUG -- [IKA_RET_0 (heartbeat)] : Hello World!! Succeed to connection to main computer!
2023-10-05 19:30:24,225 - BatchSynthesis::DEBUG -- [PUMP (heartbeat)] : [PUMP] heartbeat action success
2023-10-05 19:30:25,328 - BatchSynthesis::DEBUG -- [DS_B (heartbeat)] : [DS_B] heartbeat action success
2023-10-05 19:30:26,400 - BatchSynthesis::DEBUG -- [PIPETTE (heartbeat)] : [PIPETTE] heartbeat action success
2023-10-05 19:30:27,472 - BatchSynthesis::DEBUG -- [Science town (heartbeat)] : Hello World!! Succeed to connection to linear Actuator computer!
2023-10-05 19:30:29,551 - BatchSynthesis::DEBUG -- [VialStorage (heartbeat)] : Hello World!! Succeed to connection to main computer!
2023-10-05 19:30:29,565 - BatchSynthesis::DEBUG -- [Module Node (BatchSynthesis)] : {'Stirrer': {'Stirrer_0': {'Port': 'COM5', 'DeviceName': 'IKA_RET_0', 'Temperature': 25}}, 'Pump': {'AgNO3': {'SolutionType': 'Metal', 'PumpAddress': 1, 'PumpUsbAddr': '/dev/ttyPUMP2', 'Resolution': 1814000, 'Concentration': 0.0125, 'SyringeVolume': 5000, 'DeviceName': 'CavroCentris'}, 'H2O': {'SolutionType': 'Solvent', 'PumpAddress': 0, 'PumpUsbAddr': '/dev/ttyPUMP0', 'Resolution': 1814000, 'Concentration': 0, 'SyringeVolume': 5000, 'Connection': {'H2O': 5, 'AgNO3': 6, 'NaBH4': 7, 'H2O2': 8, 'Citrate': 9}, 'DeviceName': 'CavroCentris'}, 'NaBH4': {'SolutionType': 'Reductant', 'PumpAddress': 2, 'PumpUsbAddr': '/dev/ttyPUMP2', 'Resolution': 1814000, 'Concentration': 0.01, 'SyringeVolume': 5000, 'DeviceName': 'CavroCentris'}, 'H2O2': {'SolutionType': 'Oxidant', 'PumpAddress': 3, 'PumpUsbAddr': '/dev/ttyPUMP1', 'Resolution': 1814000, 'Concentration': 0.375, 'Density': 1.45, 'MolarMass': 34.0147, 'SyringeVolume': 5000, 'DeviceName': 'CavroCentris'}, 'Citrate': {'SolutionType': 'CA', 'PumpAddress': 4, 'PumpUsbAddr': '/dev/ttyPUMP1', 'Resolution': 1814000, 'Concentration': 0.04, 'SyringeVolume': 5000, 'DeviceName': 'CavroCentris'}}, 'DS_B': {'Id': 'dsr01', 'Model': 'm0609', 'NETWORK': '192.168.137.100', 'WorkRange': 900}, 'Pipette': {'PVP': {'SolutionType': 'Surfactant', 'PumpUsbAddr': '/dev/ttyUSB0', 'DeviceName': 'Dynamixel'}}, 'LinearActuator': {'Stirrer_location_list': [{'x': 807000, 'y': 305420}, {'x': 716240, 'y': 305420}, {'x': 877030, 'y': 375370}, {'x': 647830, 'y': 375370}, {'x': 877030, 'y': 465330}, {'x': 647830, 'y': 465330}, {'x': 807190, 'y': 534460}, {'x': 716240, 'y': 534460}], 'move_z': {'up': 125000, 'down': 150000}, 'Center_location_list': {'x': 450000, 'y': 0, 'z': 125000}}, 'VialStorage': {'DeviceName': 'VialStorage', 'Port': 'COM3', 'BaudRate': 9600}}
```

### (Module, UV-Vis) Resend heartbeat & update new device information & transfer that information to Master

```
2023-10-05 19:30:33,668 - UV-Vis::INFO -- [UV] : packet information list:['info', 'UV', 'None', 'all', 'virtual']
Send : b'heartbeat,status'
2023-10-05 19:30:35,687 - UV-Vis::DEBUG -- [USB2000plus (heartbeat)] : Hello World!! Succeed to connection to main computer!
2023-10-05 19:30:35,687 - UV-Vis::DEBUG -- [Module Node (UV-Vis)] : {'Spectrometer': {'DeviceName': 'USB2000+', 'DetectionRange': '200-850nm', 'Solvent': {'Solution': 'H2O', 'Value': 2000, 'Dimension': 'µL'}}, 'LightSource': {'DeviceName': 'DH-2000-BAL', 'DetectionRange': '210-2500nm', 'Lamp': 'deuterium(25W) and halogen lamps(20W)'}}
```

If the client makes changes to the device settings, or adds additional devices to a module node, the master node must be updated due to the allocation of device action via the new settings. The client can use the 'updateNode' command in the prompt interface to refresh the latest device information of the module node.





## Supplementary Figure S6d. Command line interface examples of job submission, hold, restart and deletion

(Client) qsub → qhold → qrestart

```
input commands (if terminate: input 'qlogout'): qstat
2023-09-24 22:29:12,389 - JobClient::INFO -- [HJ] : request to check job status
-----+-----+-----+-----+-----+-----+-----+-----+-----+-----+-----+
| userName |      jobTime      | jobID | jobFileName | current | total |      status      | modeType |
|-----+-----+-----+-----+-----+-----+-----+-----+-----+-----+-----+
| HJ       | 2023-09-24 22:28:39 | 0     | figure/jobid_0 | 6       | 18    | 6_2/18:Batch-->PrepareContainer | virtual  |
|-----+-----+-----+-----+-----+-----+-----+-----+-----+-----+-----+
2023-09-24 22:29:12,395 - JobClient::INFO -- [HJ] : succeed to check job status
input commands (if terminate: input 'qlogout'): qhold 0
2023-09-24 22:29:19,453 - JobClient::INFO -- [HJ] : request to hold job (jobID:0)
2023-09-24 22:29:21,554 - JobClient::INFO -- [HJ] : succeed to hold job (jobID:0)
input commands (if terminate: input 'qlogout'): qstat
2023-09-24 22:29:26,646 - JobClient::INFO -- [HJ] : request to check job status
-----+-----+-----+-----+-----+-----+-----+-----+-----+-----+-----+
| userName |      jobTime      | jobID | jobFileName | current | total |      status      | modeType |
|-----+-----+-----+-----+-----+-----+-----+-----+-----+-----+-----+
| HJ       | 2023-09-24 22:28:39 | 0     | figure/jobid_0 | 6       | 18    | Holding&6_2/18:Batch-->PrepareContainer | virtual  |
|-----+-----+-----+-----+-----+-----+-----+-----+-----+-----+-----+
2023-09-24 22:29:26,652 - JobClient::INFO -- [HJ] : succeed to check job status
input commands (if terminate: input 'qlogout'): qrestart 0
2023-09-24 22:29:51,758 - JobClient::INFO -- [HJ] : request to restart job (jobID:0)
2023-09-24 22:29:52,835 - JobClient::INFO -- [HJ] : succeed to restart job (jobID:0)
input commands (if terminate: input 'qlogout'): qstat
2023-09-24 22:29:55,189 - JobClient::INFO -- [HJ] : request to check job status
-----+-----+-----+-----+-----+-----+-----+-----+-----+-----+-----+
| userName |      jobTime      | jobID | jobFileName | current | total |      status      | modeType |
|-----+-----+-----+-----+-----+-----+-----+-----+-----+-----+-----+
| HJ       | 2023-09-24 22:28:39 | 0     | figure/jobid_0 | 6       | 18    | 6_2/18:Batch-->PrepareContainer | virtual  |
|-----+-----+-----+-----+-----+-----+-----+-----+-----+-----+-----+
2023-09-24 22:29:55,194 - JobClient::INFO -- [HJ] : succeed to check job status
```

(Module) qsub → qhold → qrestart

```
2023-09-24 22:29:15,071 - BatchSynthesis::INFO -- [BatchSynthesis] : packet information list:['qhold', '0']
2023-09-24 22:29:15,071 - BatchSynthesis::DEBUG -- [Module Node (UV-Vis)] : qhold:jobID 0 is holded
2023-09-24 22:29:16,269 - BatchSynthesis::INFO -- [BatchSynthesis] : packet information list:['0', 'DS_B', 'storage_empty_to_stirrer', '0,2', 'virtual']
holded jobID : 0
current input_qhold_jobID_list : [0]
2023-09-24 22:29:47,386 - BatchSynthesis::INFO -- [BatchSynthesis] : packet information list:['qrestart', '0']
2023-09-24 22:29:49,258 - BatchSynthesis::DEBUG -- [DS_B (callServer)] : [DS_B] storage_empty_to_stirrer action success
2023-09-24 22:29:54,501 - BatchSynthesis::INFO -- [BatchSynthesis] : packet information list:['0', 'LA', 'center', 'null', 'virtual']
2023-09-24 22:29:54,517 - BatchSynthesis::DEBUG -- [Science_town (virtual)] : start moving to specific location:center
2023-09-24 22:29:54,517 - BatchSynthesis::DEBUG -- [Science_town (virtual)] : location:center
```

(Client) qsub → qhold → qdel

```
input commands (if terminate: input 'qlogout'): qstat
2023-09-24 22:36:39,641 - JobClient::INFO -- [HJ] : request to check job status
-----+-----+-----+-----+-----+-----+-----+-----+-----+-----+-----+
| userName |      jobTime      | jobID | jobFileName | current | total |      status      | modeType |
|-----+-----+-----+-----+-----+-----+-----+-----+-----+-----+-----+
| HJ       | 2023-09-24 22:36:31 | 0     | figure/jobid_0 | 6       | 18    | 6_0/18:Batch-->PrepareContainer | virtual  |
|-----+-----+-----+-----+-----+-----+-----+-----+-----+-----+-----+
2023-09-24 22:36:39,647 - JobClient::INFO -- [HJ] : succeed to check job status
input commands (if terminate: input 'qlogout'): qhold 0
2023-09-24 22:36:54,547 - JobClient::INFO -- [HJ] : request to hold job (jobID:0)
2023-09-24 22:36:56,636 - JobClient::INFO -- [HJ] : succeed to hold job (jobID:0)
input commands (if terminate: input 'qlogout'): qstat
2023-09-24 22:37:04,715 - JobClient::INFO -- [HJ] : request to check job status
-----+-----+-----+-----+-----+-----+-----+-----+-----+-----+-----+
| userName |      jobTime      | jobID | jobFileName | current | total |      status      | modeType |
|-----+-----+-----+-----+-----+-----+-----+-----+-----+-----+-----+
| HJ       | 2023-09-24 22:36:31 | 0     | figure/jobid_0 | 6       | 18    | Holding&6_1/18:Batch-->PrepareContainer | virtual  |
|-----+-----+-----+-----+-----+-----+-----+-----+-----+-----+-----+
2023-09-24 22:37:04,721 - JobClient::INFO -- [HJ] : succeed to check job status
input commands (if terminate: input 'qlogout'): qdel 0
2023-09-24 22:37:06,673 - JobClient::INFO -- [HJ] : request to delete job (jobID:0)
2023-09-24 22:37:07,733 - JobClient::INFO -- [HJ] : succeed to delete job (jobID:0)
input commands (if terminate: input 'qlogout'): qstat
2023-09-24 22:37:12,696 - JobClient::INFO -- [HJ] : request to check job status
-----+-----+-----+-----+-----+-----+-----+-----+-----+-----+-----+
| userName | jobTime | jobID | jobFileName | current | total | status | modeType |
|-----+-----+-----+-----+-----+-----+-----+-----+-----+-----+-----+
|-----+-----+-----+-----+-----+-----+-----+-----+-----+-----+-----+
2023-09-24 22:37:12,702 - JobClient::INFO -- [HJ] : succeed to check job status
input commands (if terminate: input 'qlogout'): █
```

(Module) qsub → qhold → qdel

```
2023-09-24 22:36:50,168 - BatchSynthesis::INFO -- [BatchSynthesis] : packet information list:['qhold', '0']
2023-09-24 22:36:50,168 - BatchSynthesis::DEBUG -- [Module Node (UV-Vis)] : qhold:jobID 0 is holded
2023-09-24 22:36:54,042 - BatchSynthesis::INFO -- [BatchSynthesis] : packet information list:['0', 'DS_B', 'storage_empty_to_stirrer', '0,1', 'virtual']
holded jobID : 0
current input_qhold_jobID_list : [0]
2023-09-24 22:37:02,296 - BatchSynthesis::INFO -- [BatchSynthesis] : packet information list:['qdel', '0']
```

The client can temporarily pause the submitted job or execute the job using the 'qhold' command. When the client enters 'qhold', the master node sends the job ID to the module node due to a job pause. Then, the module node stores the job ID and holds all the device actions of that job ID. If the client enters the 'qrestart' command, the paused job resumes. However, if the client enters the 'qdel' command, the paused job will be deleted.

### 3. Job executions in the master node

#### Supplementary Figure S7. Functions of the task generator

#### Supplementary Figure S7a. Detailed workflow of update device settings in resource manager

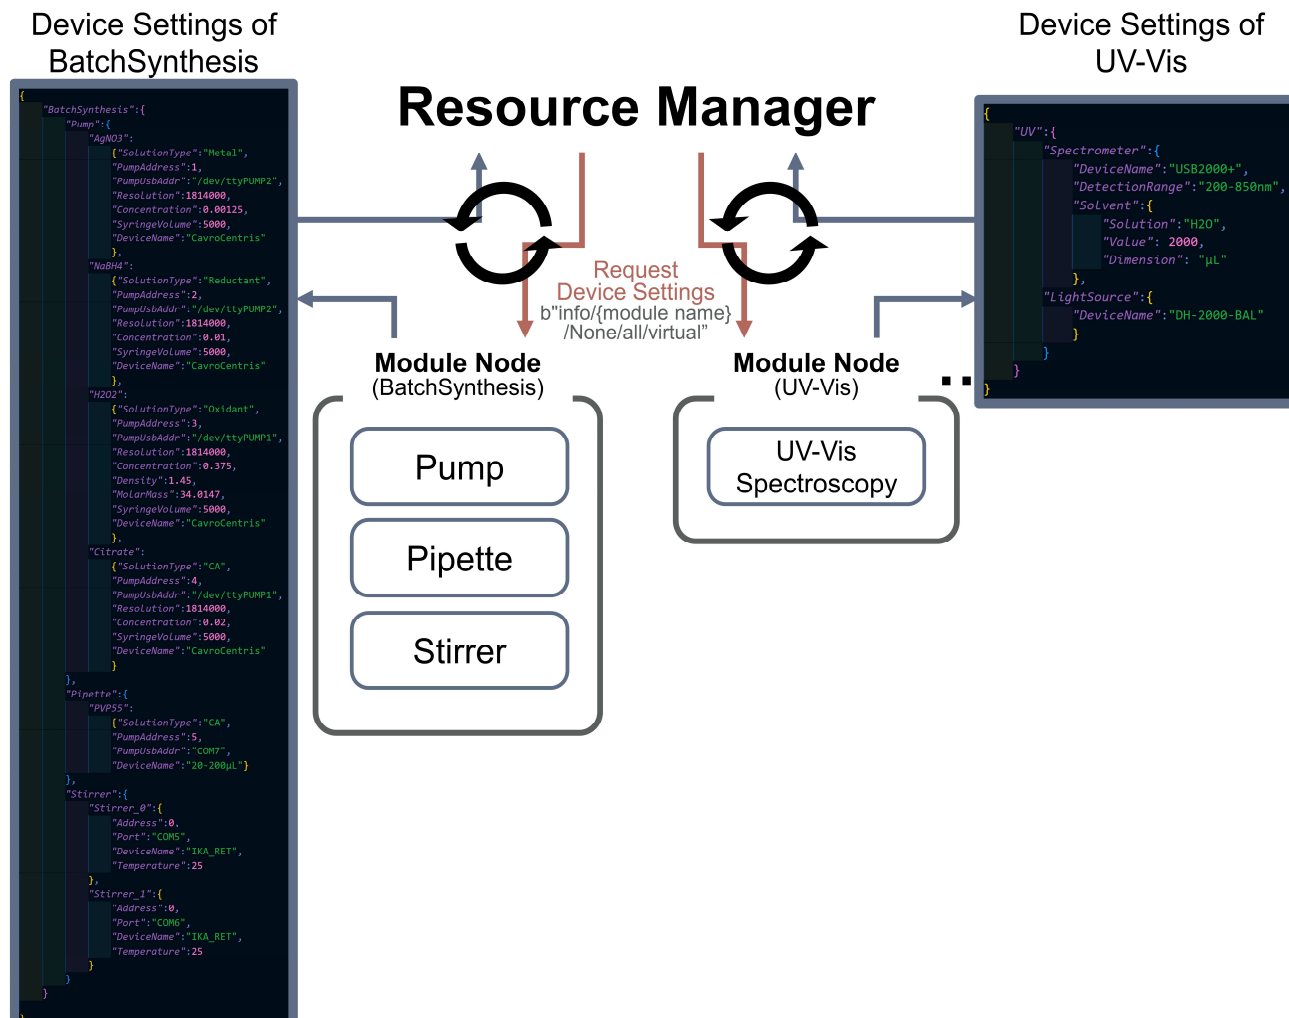

## Supplementary Figure S7b. Task reflection depending on latest device information

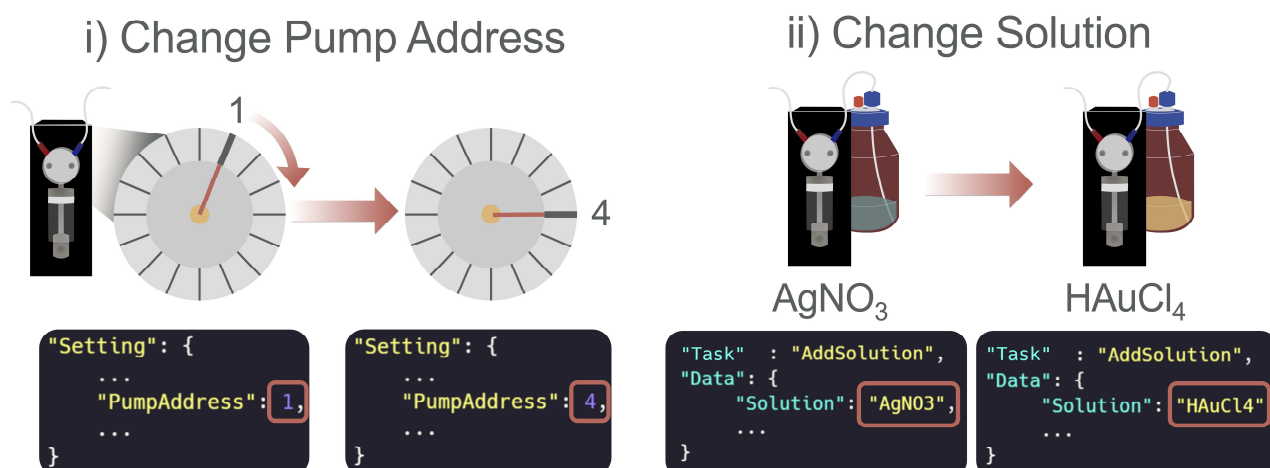

## Supplementary Figure S7c. Detailed workflow of the task generator

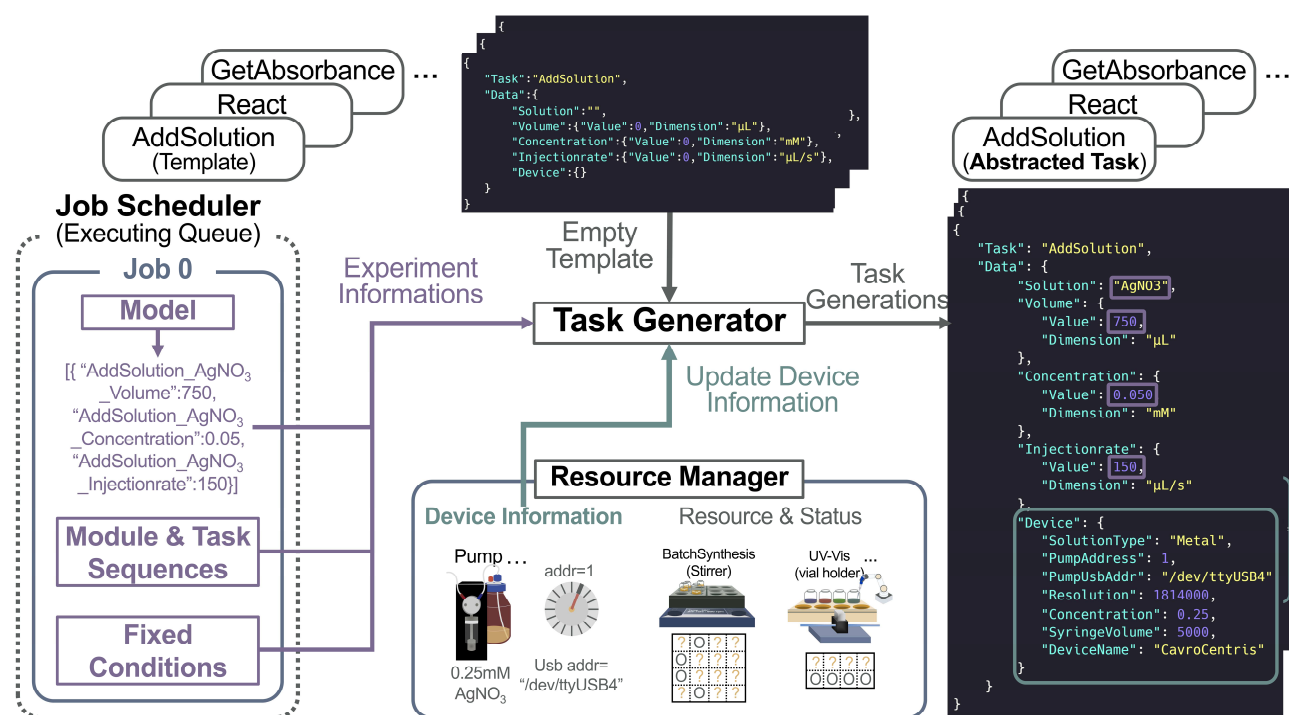

## Supplementary Figure S7d. Examples of task templates

```
# Robot
self.MoveContainer_template={
  "Task":"MoveContainer",
  "Data":{
    "From":"",
    "To":"",
    "Container":"",
    "Device":{}
  }
}

# BatchSynthesis
self.PrepareContainer_template={
  "Task":"PrepareContainer",
  "Data":{
    "From":"",
    "To":"",
    "Container":"",
    "Device":{}
  }
}

self.AddSolution_template={
  "Task":"AddSolution",
  "Data":{
    "Solution":"",
    "Volume":{
      "Value":0,"Dimension":"µL"
    },
    "Concentration":{
      "Value":0,"Dimension":"mM"
    },
    "Injectionrate":{
      "Value":0,"Dimension":"µL/s"
    },
    "Device":{}
  }
}

self.Stir_template={
  "Task": "Stir",
  "Data": {
    "StirRate": {
      "Value": 0,
      "Dimension": "rpm"
    },
    "Device":{}
  }
}

self.Heat_template={
```



```

    "Task": "Heat",
    "Data": {
        "Temperature": {
            "Value": 0,
            "Dimension": "°C"
        },
        "Device": {}
    }
}
self.Mix_template={
    "Task": "Mix",
    "Data": {
        "Time": {
            "Value": 0,
            "Dimension": "sec"
        },
        "Device": {}
    }
}
self.React_template={
    "Task": "React",
    "Data": {
        # "To": "",
        "Time": {
            "Value": 0,
            "Dimension": "sec"
        },
        "Device": {}
    }
}
}

```

```

# UV-Vis
self.GetAbs_template={
    "Task": "GetAbs",
    "Data": {
        "Device": {},
        "Hyperparameter": {
            "WavelengthMin": {
                "Description": "WavelengthMin=300 (int): slice wavelength section
depending on wavelength_min and wavelength_max",
                "Value": 0,
                "Dimension": "nm"
            },
            "WavelengthMax": {
                "Description": "WavelengthMax=849 (int): slice wavelength section
depending on wavelength_min and wavelength_max",
                "Value": 0,
                "Dimension": "nm"
            }
        }
    }
}

```

```

"BoxCarSize":{
  "Description":"BoxCarSize=10 (int): smooth strength",
  "Value": 0,
  "Dimension": "None"
},
"Prominence":{
  "Description":"Prominence=0.01 (float): minimum peak Intensity for
detection",
  "Value": 0,
  "Dimension":"None"
},
"PeakWidth":{
  "Description":"PeakWidth=20 (int): minumum peak width for detection",
  "Value": 0,
  "Dimension": "nm"
}
}
},
}
}

```

The origin of task template has empty value. The examples of template uploaded in Github repository. (<https://github.com/KIST-CSRC/Octopus>)

**Supplementary Figure S7e. Conversion of job script in terms of task sequences in the task generator**

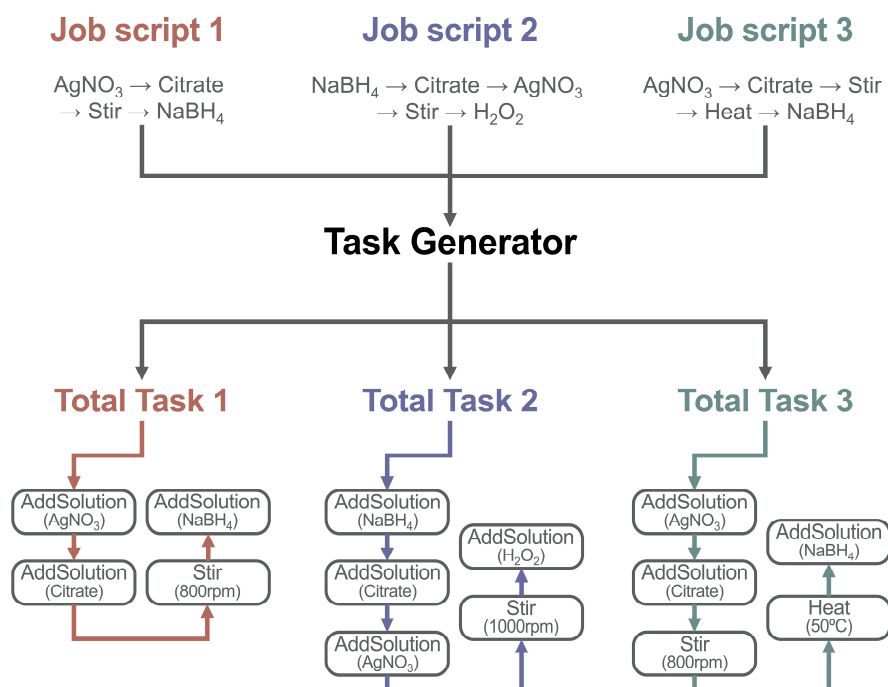

A task generator allows clients to create process recipes based on their desired experimental conditions and process sequences. To execute various process sequences for each job script, we would present the generated recipe in the JSON data format shown in the GitHub repository.

## Supplementary Figure S8. Examples of resource allocation in batch synthesis module

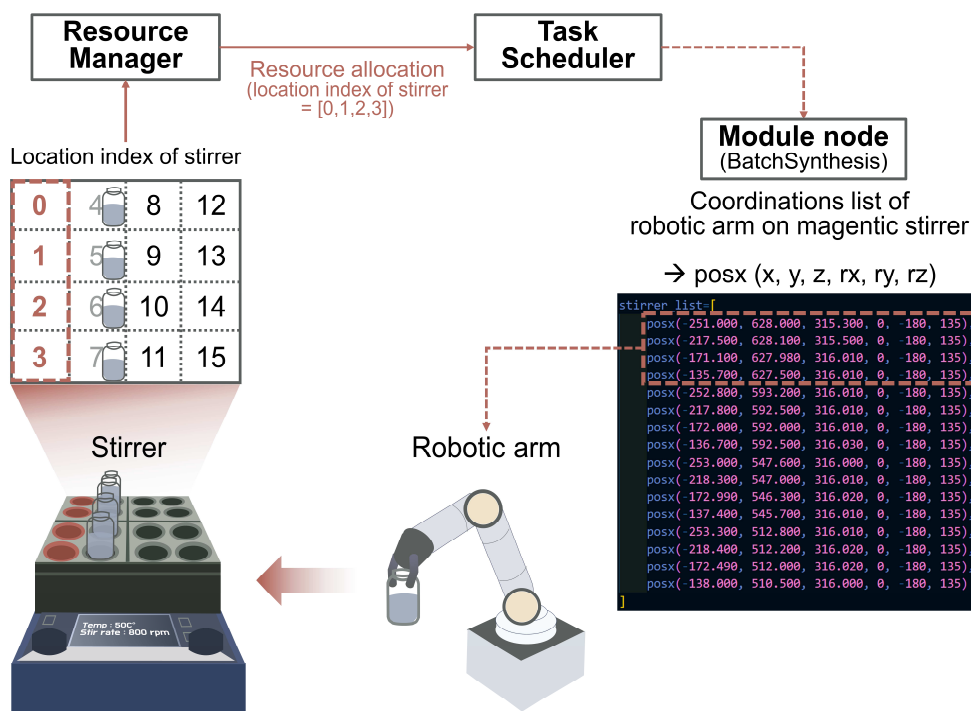

## Supplementary Figure S9. The role of action translator for abstraction and digitalization

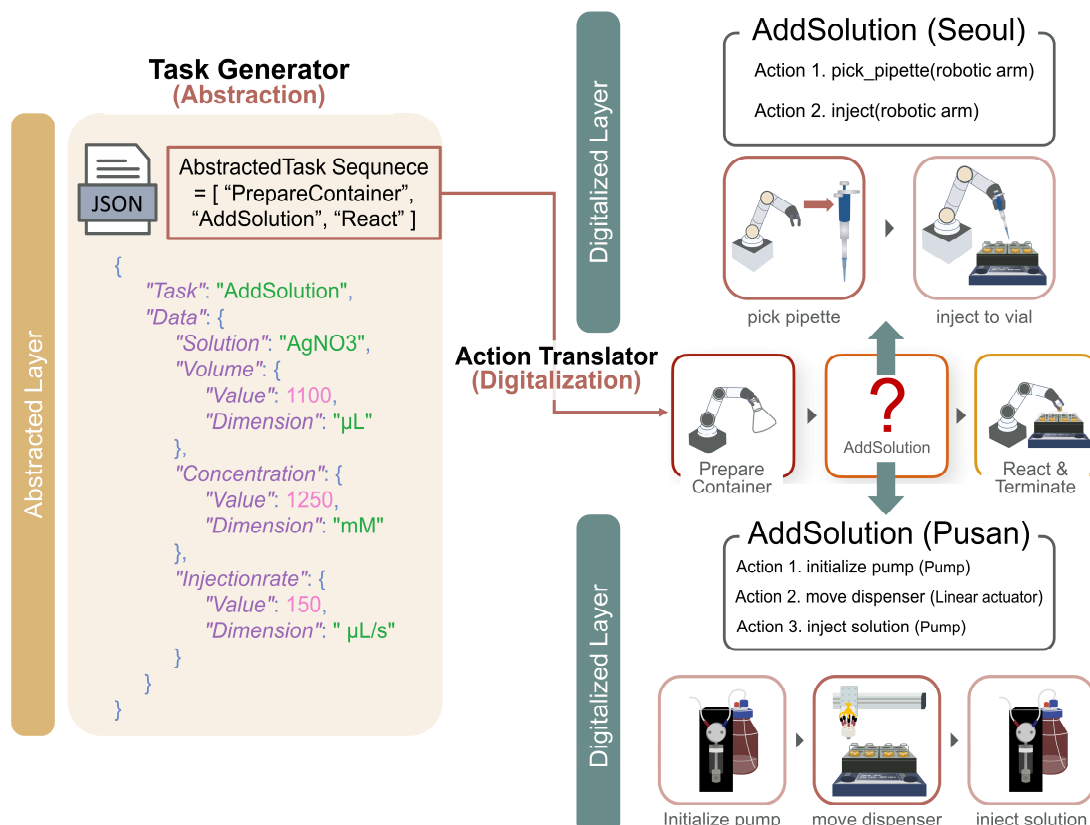

## Supplementary Figure S10. Functions of the action executor

### Supplementary Figure S10a. Predefined device commands of the action executor

| Device                        | Pre-defined data transfer formats                                                                              | Example                                  |
|-------------------------------|----------------------------------------------------------------------------------------------------------------|------------------------------------------|
| Robotic Arm (DooSan_Robotics) | {jobID}/DS_B/{pick_and_place type} /{pick_num,place_num}/{mode_type}                                           | 0/DS_B/storage_empty_to_stirrer/0&2/real |
| Vial Storage                  | {jobID}/STORAGE/open/1/{mode_type}                                                                             | 0/STORAGE/open/5/real                    |
| Pump                          | {jobID}/PUMP/single/{solution_name,volume,concentration,injection_rate}/{mode_type}                            | 4/PUMP/single/AgNO3&1500&0.05&100/real   |
| Stirrer                       | {jobID}/STIRRER/{stir_type or heat_type}/ {stirrer_address,temperature}/{mode_type}                            | 3/STIRRER/Heat/0&25/real                 |
| LA                            | {jobID}/LA/{move_type}/{location_index}/{mode_type}                                                            | 1/LA/down/0/real                         |
| UV-Vis Spectroscopy           | {jobID}/SPECTROSCOPY/Abs/{element}/{mode_type}                                                                 | 6/SPECTROSCOPY/Abs/Ag/real               |
| Pipetting Machine             | {jobID}/PIPETTE/sample/{pipette_volume,inject_volume,tip_loc,pump_in_loc,pump_out_loc,mixing_time}/{mode_type} | 2/PIPETTE/sample/&2-20&2&5&0&3&3/real    |
| ...                           | ...                                                                                                            | ...                                      |

### Supplementary Figure S10b. Detailed workflow of the action executor

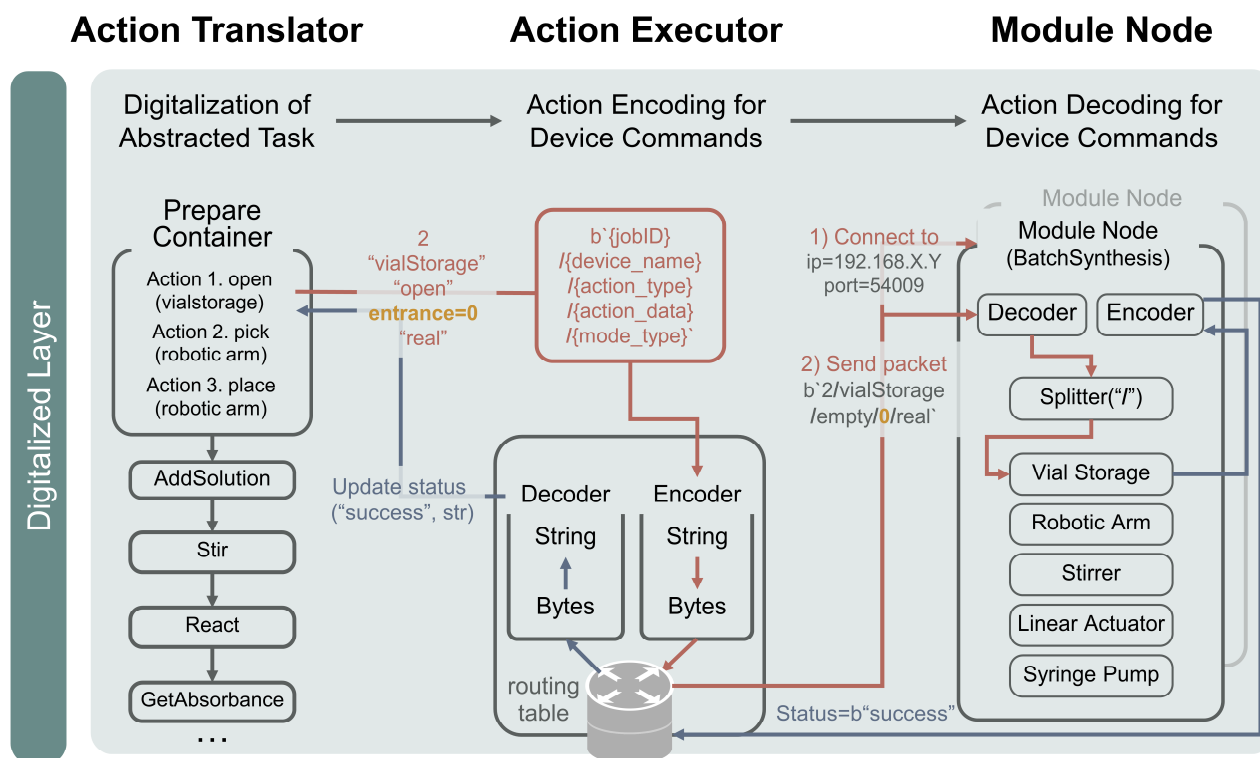

## Supplementary Figure S11. Hierarchy structure of the generated material data

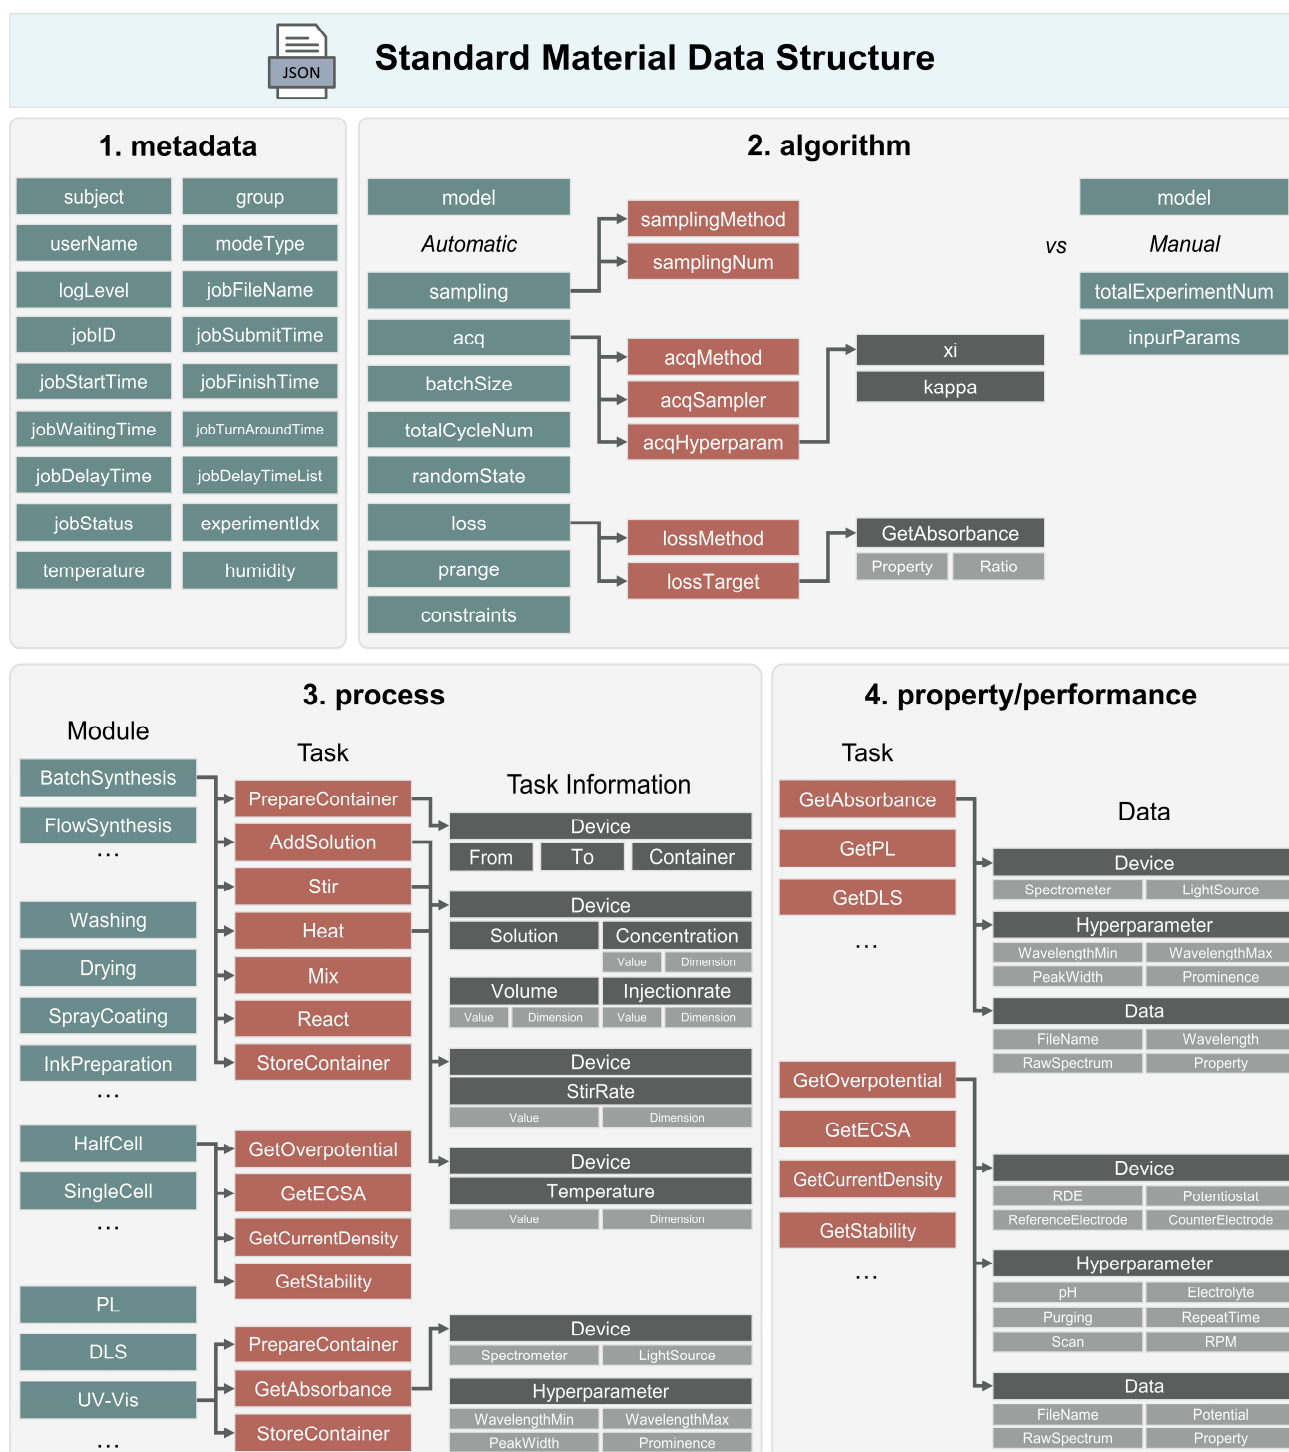

The second auxiliary function is to store the results of the experiments in individual JSON files, and is conducted during the job cycle. (Figure S12a, Supplementary Information) The reason for choosing JSON is its flexible, computer-readable structure. In the MAP for chemical experiments, there are various modules, each containing diverse tasks, device types and device settings. Given this variability, storing the material data in a structured format within a relational database would be challenging. In other words, tabular data with a relational database to store the task information in MAPs, inevitably face quite a sparse table due to the tremendous diversity of the attributes and methods from the various device settings and module components.

Therefore, we implement a nonstructured data format with inclusivity for the data structure of MAP. The most significant feature of JSON is its hierarchical structure. A well-defined JSON format enhances the flexibility of storing attributes/methods of diverse tasks and aids in data readability, making it easier for clients to understand the processes. Furthermore, the JSON format is a commonly used data specification on the web, so it helps to easily convert CLI to a web-based interface. We designate the standard material data structure with four main hierarchical keys—metadata, algorithms, processes and property/performances—as the highest-level categories. To enable the utilization of the accumulated data for AI-driven experimental planning in the future, we implement MongoDB, which stores and manages the JSON data.

## 4. Network-protocol-based modularization

### Supplementary Figure S12. Process modularization for homogeneity via device server

#### Supplementary Figure S12a. An actual example of heterogeneous environments

**Module Node = BatchSynthesis**

**Module Node**  
 **Device Server**

| Operating System            | Doosan Robotics (Robotic Arm) | XYZ Linear Actuator | Vial Storage | Stirrer | Syringe Pump (Solution Dispenser) |
|-----------------------------|-------------------------------|---------------------|--------------|---------|-----------------------------------|
| Linux                       | O                             | X                   | O            | O       | O                                 |
| <b>Windows</b>              | X                             | O                   | O            | O       | O                                 |
| <b>Programming Language</b> | -                             | -                   | -            | -       | -                                 |
| <b>Python</b>               | O                             | X                   | O            | O       | O                                 |
| C++                         | O                             | O                   | X            | X       | X                                 |

#### Module Node = UV-Vis

| Operating System            | Doosan Robotics (Robotic Arm) | uArm Swift Pro (pipetting machine) | Linear Actuator (pipette) | UV-Vis Spectroscopy |
|-----------------------------|-------------------------------|------------------------------------|---------------------------|---------------------|
| Linux                       | O                             | O                                  | X                         | O                   |
| <b>Windows</b>              | X                             | O                                  | O                         | O                   |
| <b>Programming Language</b> | -                             | -                                  | -                         | -                   |
| <b>Python</b>               | O                             | O                                  | O                         | O                   |
| C++                         | O                             | X                                  | X                         | O                   |

We configured the module node using Python based on the Windows OS. Communication between the environment of the module node and other devices is designed to set up a device server, enabling interaction with the module node. The table represents the configuration of our module node, as presented in our recent research.<sup>[3]</sup>

**Supplementary Figure S12b. Virtual workflow of the network protocol with a hierarchical structure**

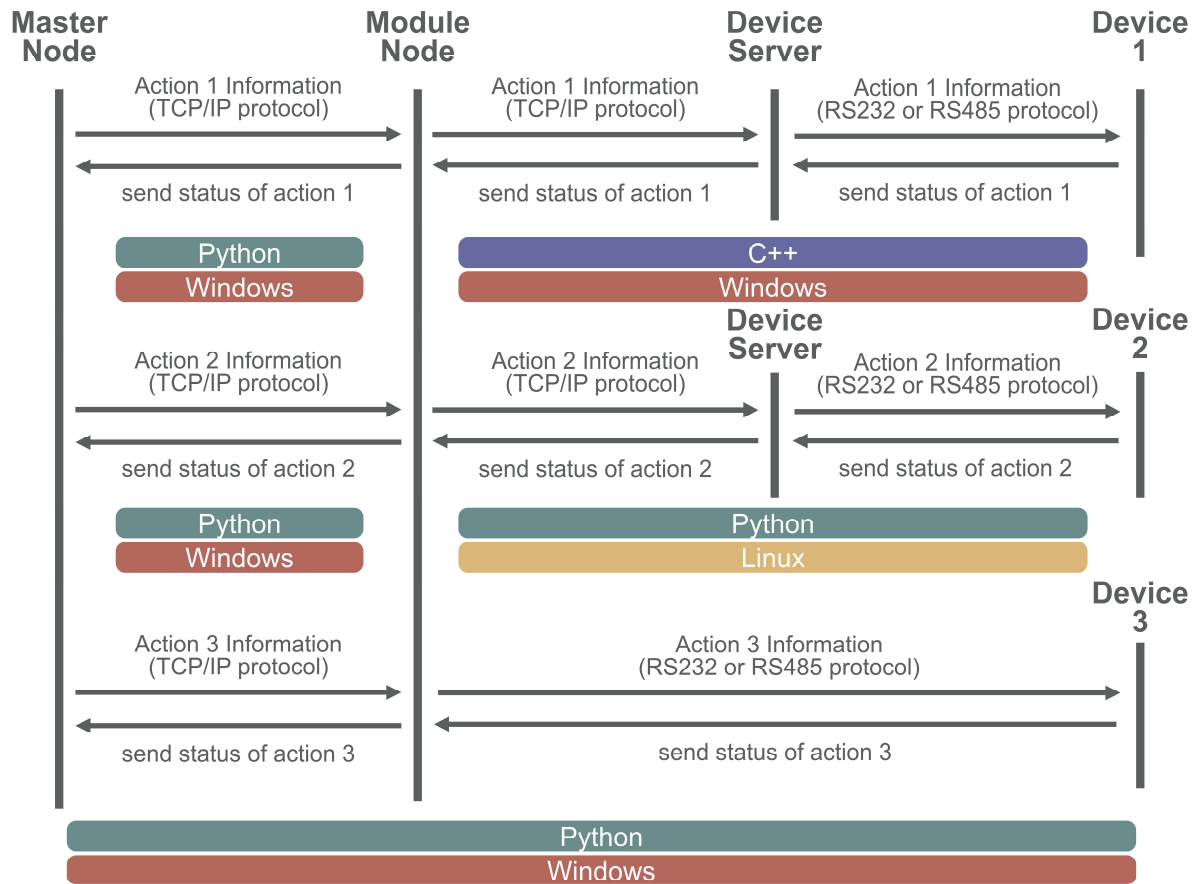

This workflow depends on device settings of modules.

## Supplementary Figure S13. Process modularization for scalability via internal and external network

### Supplementary Figure S13a. Utilization of the internal network protocol in the routing table

| Process          | Internal IP address |
|------------------|---------------------|
| Synthesis        | 192.168.1.X         |
| Preprocess       | 192.168.2.X         |
| Evaluation       | 192.168.3.X         |
| Characterization | 192.168.4.X         |
| Database         | 192.168.5.X         |

  

| Module (Preprocess) | Internal IP address |
|---------------------|---------------------|
| InkPreparation      | 192.168.2.11        |
| BallMilling         | 192.168.2.12        |
| Washing             | 192.168.2.13        |
| ...                 | ...                 |

  

| Module (Preprocess → Washing) | Internal IP address | Internal PORT |
|-------------------------------|---------------------|---------------|
| Pipette (Module PC)           | 192.168.2.13        | 54009         |
| Sonication (Module PC)        | 192.168.2.13        | 54009         |
| Centrifuge (Device Server 1)  | 192.168.2.13        | 54011         |
| Robotic arm (Device Server 2) | 192.168.2.13        | 54012         |
| ...                           | ...                 | ...           |

The third number represents the type of experimental process, and the fourth number represents the module information. The types of experimental processes include synthesis, preprocessing, evaluation, characterization and database, which are commonly defined in chemical experiments. These experimental processes were represented by numbers from 1 to 5, making it easy for researchers to identify which process they belong to via the third number alone. Starting from the fourth number, different modules are included in the same process type. For example, within the same preprocessing category, various modules might be grouped, such as processes for washing, ball milling, ink preparation, spray coating and sonication. In the fourth part of the internal network address, the presence of '1' represents the gateway. Consequently, modules should be sequentially recorded in the routing table starting from '11'.

In network protocols, broadcast refers to a method of sending messages or data packets across a network to multiple computers or network devices simultaneously via a single transmission. This means that the information is sent to all the devices on the network without specifying a specific target computer or device. Broadcast is typically used for network management, debugging, or when the same message needs to be sent to multiple devices. We set the internal network address of the emergency stop to “192.168.255.255”. The term “255” enables broadcasting via an internal network protocol.



Supplementary Figure S13b. Virtual examples of scalable autonomous experiment platform based on internal and external network

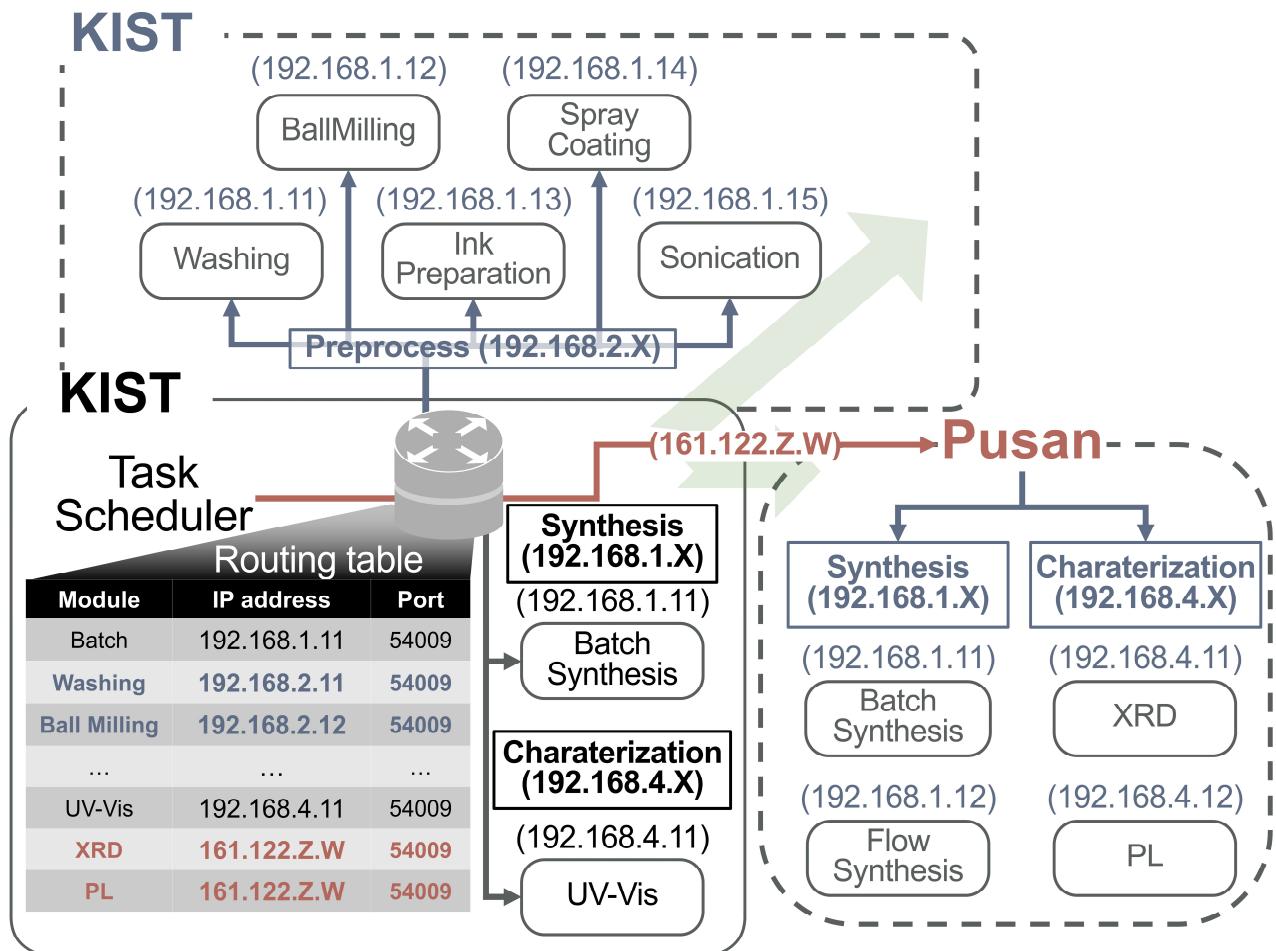



### Supplementary Figure S14c. Real messages of the alert system showing the experiment progress

-  Auto Lab (Main) **BOT**  
##### [Automatic\_synthesis\_UV-HJ] Experiment 1 is running #####  
오후 4:40
-  Auto Lab (Main) **BOT**  
##### [Automatic\_synthesis\_UV-HJ] Experiment 1 is done #####  
오후 4:50

This message is the result of communication through Dooray Messenger.<sup>[4]</sup>

### Supplementary Figure S14d. Real messages of the alert system for device disconnection via heartbeat

-  Auto Lab (Main) **BOT**  
[BatchSynthesis] LinearActuator is disconnected, please check status of connection
-  Auto Lab (Main) **BOT**  
[UV-Vis] Pipetting Machine (uArm Swift Pro) is disconnected, please check status of connection

This message is the result of communication through Dooray Messenger.<sup>[4]</sup>

### Supplementary Figure S14e. Real messages of the alert system via the restock function for chemical vessels

-  Auto Lab (Main) **BOT**  
[BatchSynthesis] vial number (6) is not enough, please move vial to another where
-  Auto Lab (Main) **BOT**  
[BatchSynthesis] vial number (6) is not enough, please fill vial
-  Auto Lab (Main) **BOT**  
[UV-Vis] tip number (8) is not enough, please fill tip

This message is the result of communication through Dooray Messenger.<sup>[4]</sup>

## 5. Job parallelization to address the module overlap challenge

Supplementary Figure S15. Schematic algorithm of job parallelization

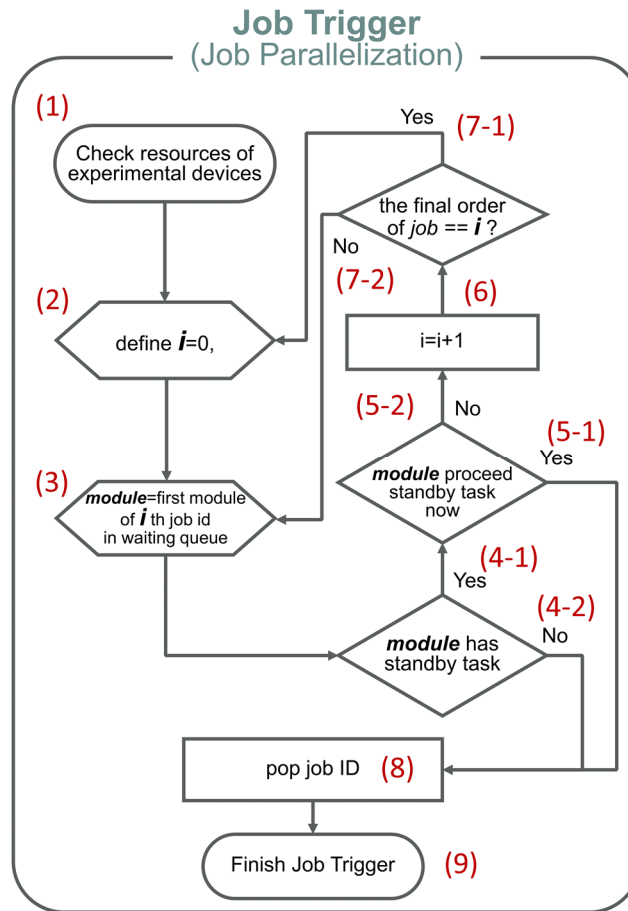

1. Check the resources of the experimental equipment set on the modules.
2. Set an index  $i$  (the index  $i$  represents the position index of the stacked job ID in the waiting queue).
3. The name of the module that is to be executed is retrieved first according to the predefined module execution order from the job, with the job ID corresponding to the  $i$ -th position within the waiting queue. This is denoted as a "**module**" in the diagram.
4. Does the "**module**" own a device standby task?
  - 4-1. If yes, proceed to (5).
  - 4-2. If not, proceed to (8).
5. Is the "**module**" executing a device standby task?
  - 5-1. If yes, proceed to (8).
  - 5-2. If not, proceed to (6).
6. The index  $i$  is incremented by 1.
7. Determine if index  $i$  is the last.
  - 7-1. If  $i$  is the last order, return to (2) → Reset  $i$  to check the job with the job ID corresponding to the first order in the waiting queue.
  - 7-2. If  $i$  is not the last order, proceed to (3) → Search for the first module to execute in the job with the job ID corresponding to the next order in the waiting queue.
8. Pop the job ID corresponding to index  $i$  from the waiting queue.
9. End the job trigger.

## Supplementary Figure S16. The timeline of the modules used for catalyst development included device standby time

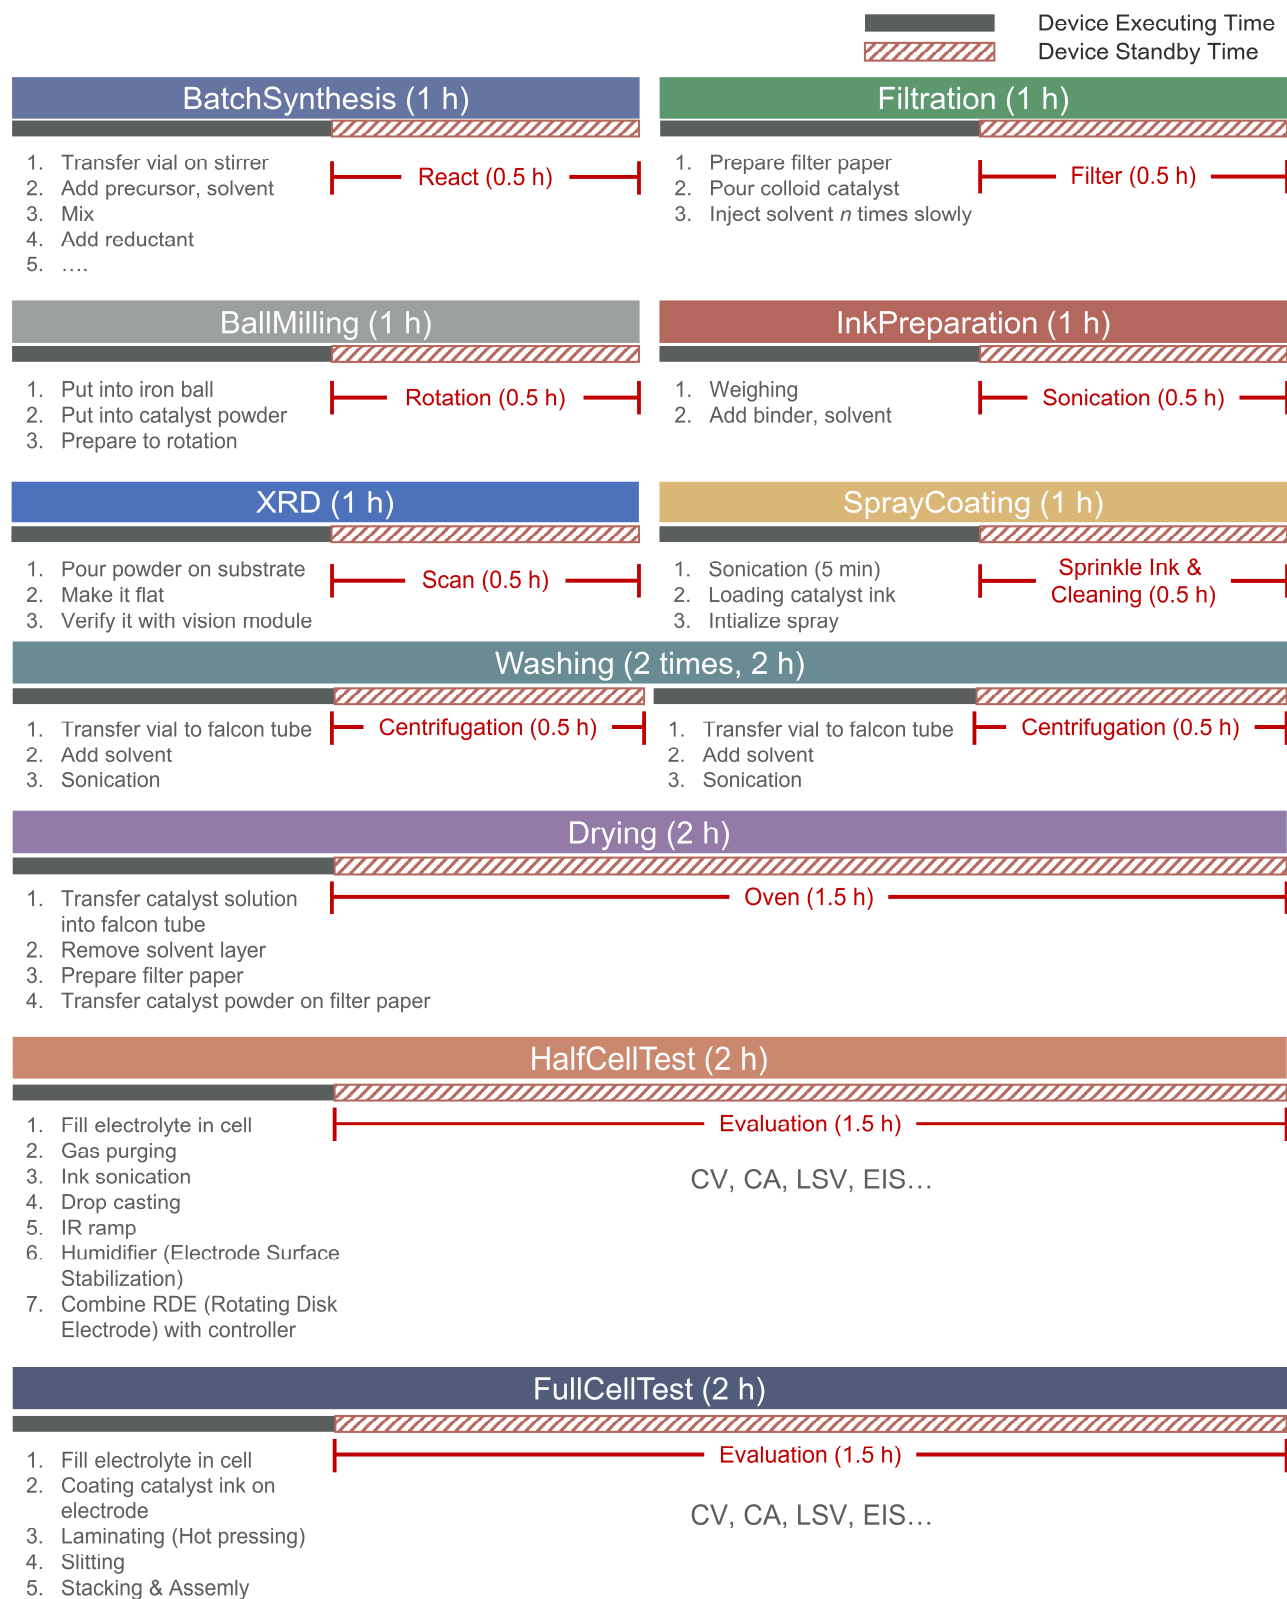

## Supplementary Figure S17. Multiple jobs for catalyst application

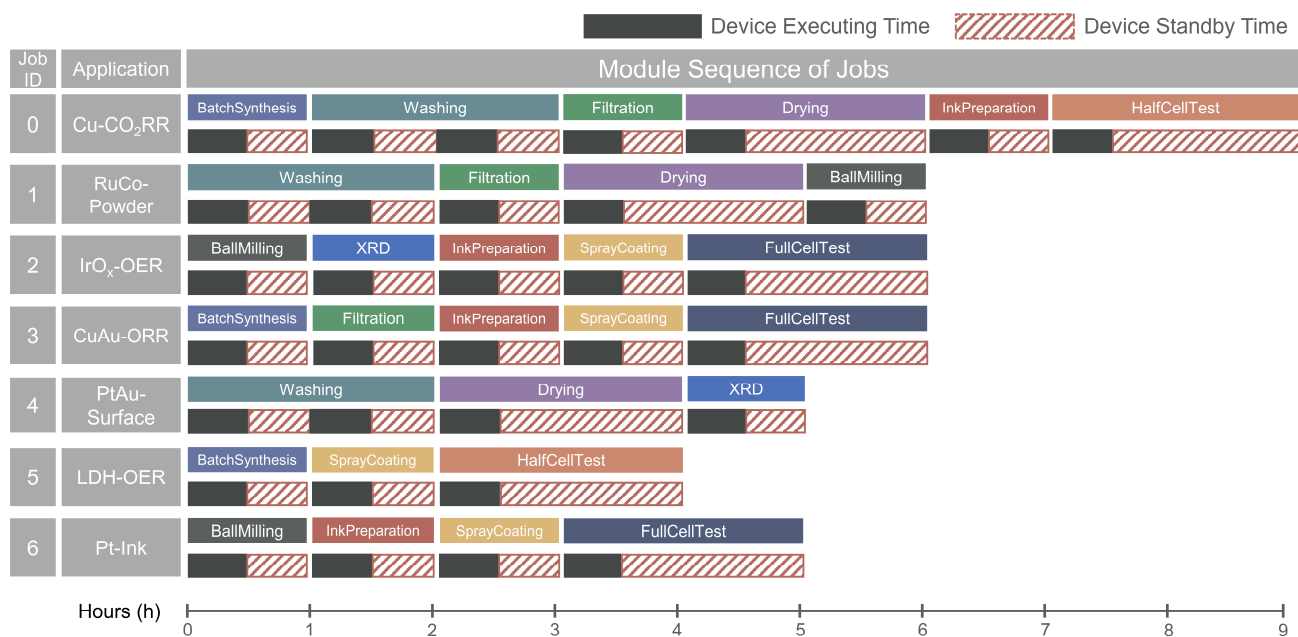

## Supplementary Figure S18. Definition of performance metrics

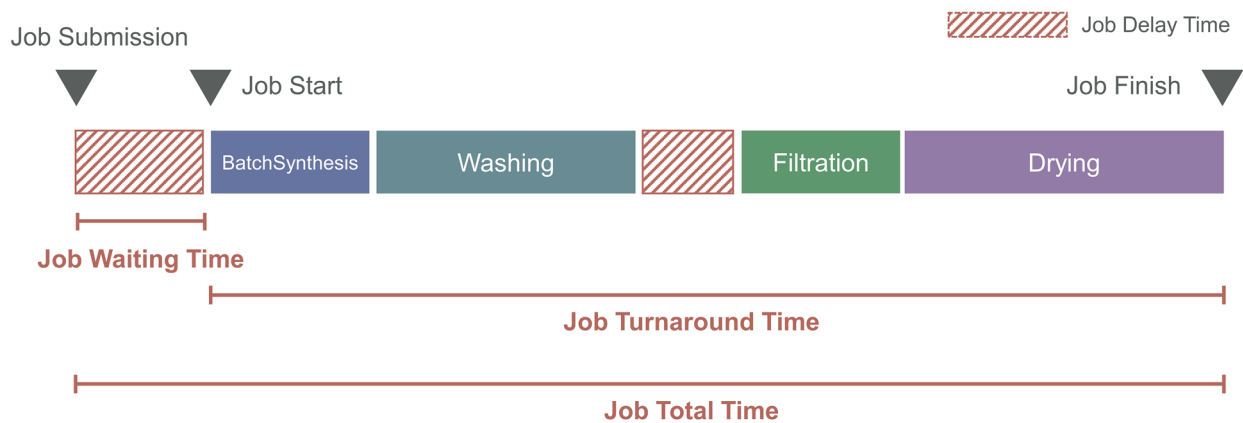

## Supplementary Table S1. Performance metrics of job parallelization

Supplementary Table 1a. Job waiting time between serialization and parallelization

| Job ID | Serialization (h) | Parallelization (h) |
|--------|-------------------|---------------------|
| 0      | 0                 | 0                   |
| 1      | 0                 | 0                   |
| 2      | 0                 | 0                   |
| 3      | 1                 | 0.5                 |
| 4      | 4                 | 0.5                 |
| 5      | 2                 | 1                   |
| 6      | 1                 | 0.5                 |

Supplementary Table 1b. Job turnaround time between serialization and parallelization

| Job ID | Serialization (h) | Parallelization (h) |
|--------|-------------------|---------------------|
| 0      | 10                | 9                   |
| 1      | 5                 | 5                   |
| 2      | 6                 | 6                   |
| 3      | 9                 | 6                   |
| 4      | 6                 | 5                   |
| 5      | 5                 | 4                   |
| 6      | 7                 | 5                   |

Supplementary Table 1c. Job total time between serialization and parallelization

| Job ID | Serialization (h) | Parallelization (h) |
|--------|-------------------|---------------------|
| 0      | 10                | 9                   |
| 1      | 5                 | 5                   |
| 2      | 6                 | 6                   |
| 3      | 10                | 6.5                 |
| 4      | 10                | 5.5                 |
| 5      | 7                 | 5                   |
| 6      | 8                 | 5.5                 |

## 6. Task optimization for preventing device overlaps.

Supplementary Figure S19. A bird's eye view image of modules including “BatchSynthesis” and “UV-Vis”

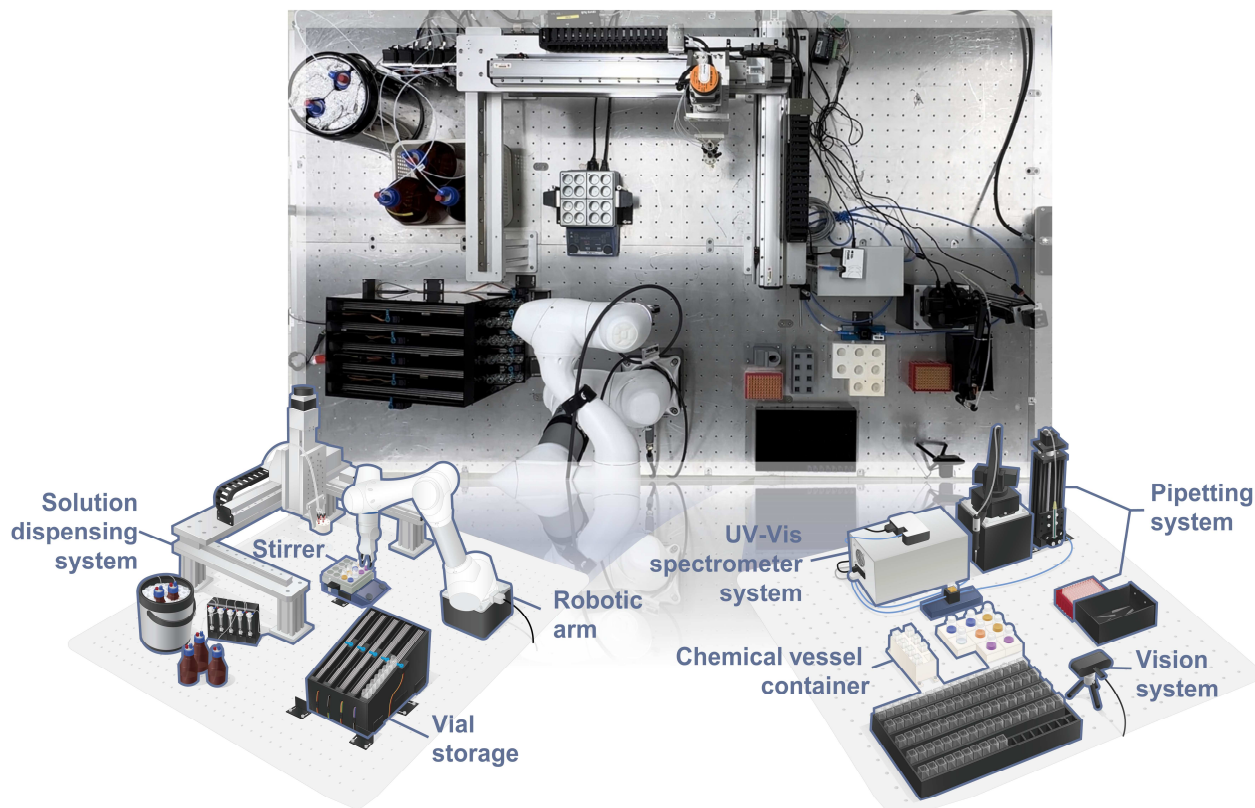

This image is a module used in a previous study<sup>[3]</sup>.

Supplementary Figure S20. Computing results of Boolean operation in python

| Boolean | Operation | Boolean | Result  |
|---------|-----------|---------|---------|
| True    | * (and)   | True    | 1=True  |
| True    | * (and)   | False   | 0=False |
| False   | * (and)   | True    | 0=False |
| False   | * (and)   | False   | 0=False |



## Supplementary Figure S21. Real examples of masking table

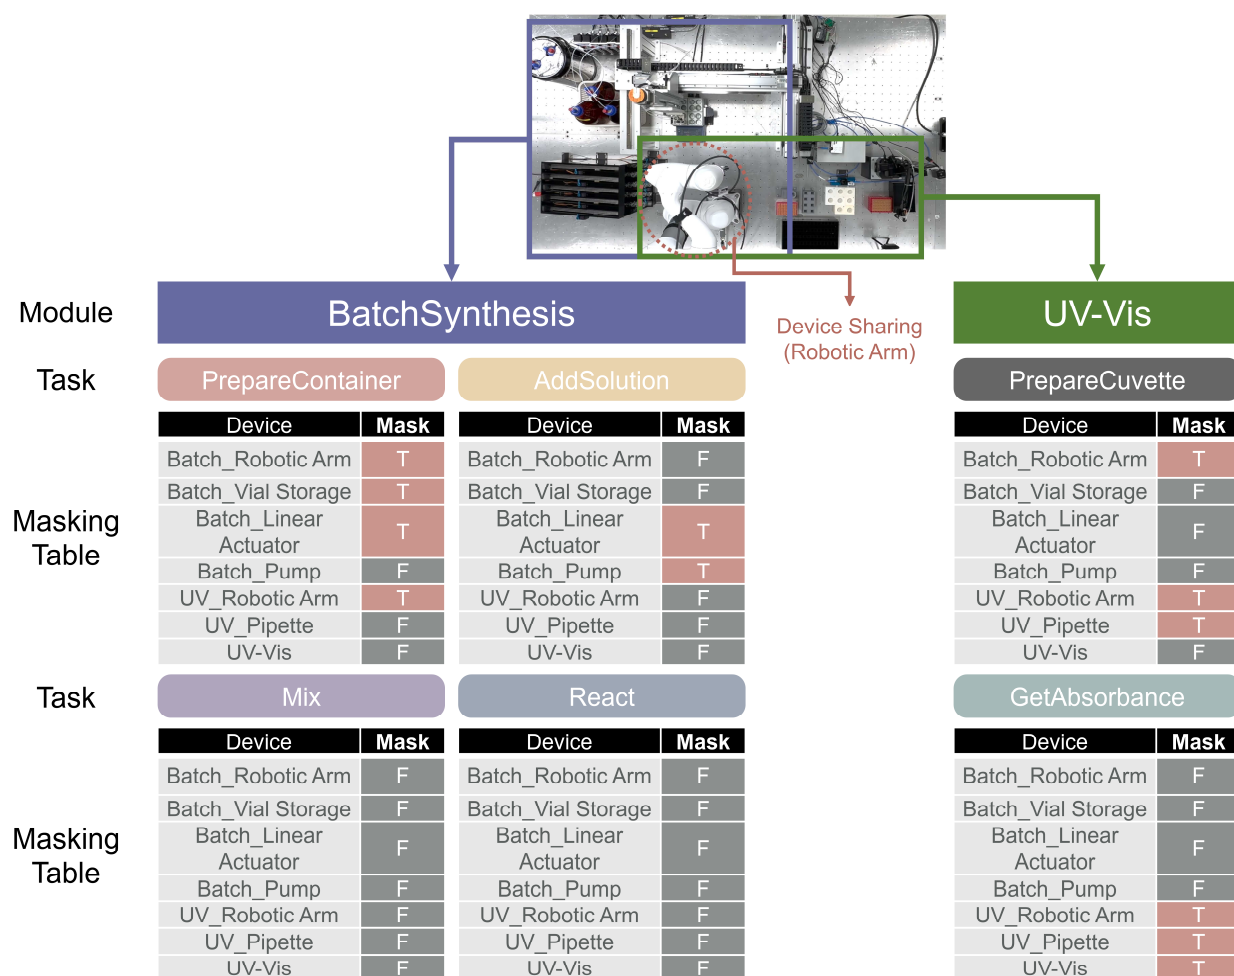

The “BatchSynthesis” module has four resources which include the number of vials that can be processed in the magnetic stirrer. The “UV-Vis” module has also four resources which represents the number of vial holders storing vials for “UV-Vis” spectrum measurements. The image of hardware is a module used in a previous study<sup>[3]</sup>.

# 7. The closed-packing schedule for optimizing module resource

## Supplementary Figure S22. Definition of resource in realistic platform

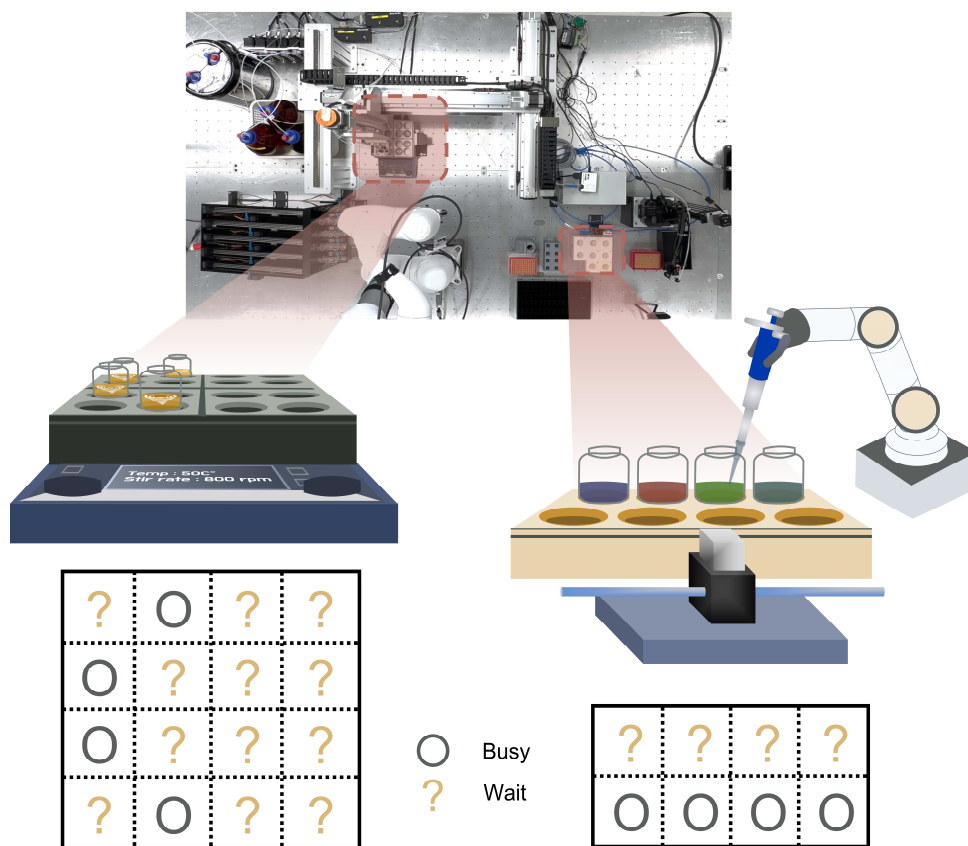

**Resource of BatchSynthesis**  
(Stirrer)

**Resource of UV-Vis**  
(Vial holder)

The batch synthesis module has four resources which include the number of vials that can be processed in the magnetic stirrer. The UV-Vis module has also four resources which represents the number of vial holders storing vials for UV-Vis spectrum measurements. The image of hardware is a module used in a previous study<sup>[3]</sup>.



## 8. Performance test of user-optimal schedulers

Supplementary Figure S24. Schematic design of conventional scheduling algorithm (FCFS)

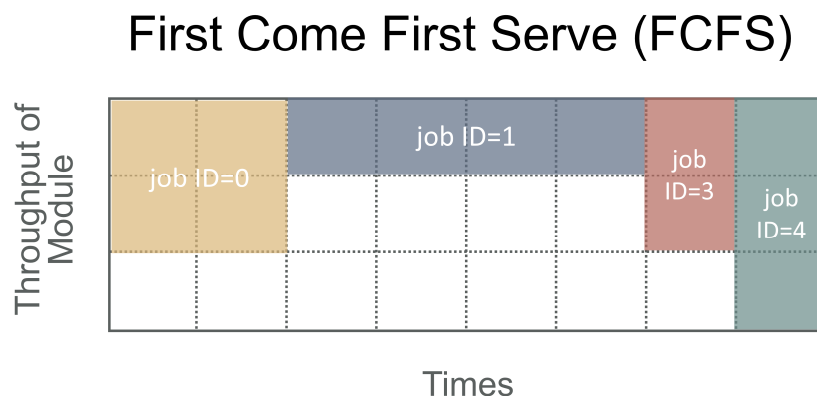

Supplementary Figure S25. Job information for benchmark test of user-optimal schedulers

| (job ID)<br>Job Submission Time | (job ID)<br>Job Start Time | (job ID)<br>Job Finish Time | Experiment Type         | Module Selection        | Batch Size | Numbers of Cycle | Task Time with Device Standby Time | The Number of AddSolution (BatchSynthesis) |
|---------------------------------|----------------------------|-----------------------------|-------------------------|-------------------------|------------|------------------|------------------------------------|--------------------------------------------|
| (0) 09:00                       | (0) 09:00                  | (0) 18:45                   | Automated (Closed-loop) | Batch Synthesis, UV-Vis | 6          | 3                | React (120 min)                    | 4                                          |
| <b>(1) 09:07</b>                | <b>(1) 09:45</b>           | (1) 11:47                   | Manual                  | Batch Synthesis         | 4          | 1                | React (40 min)                     | 4                                          |
| (2) 09:54                       | (2) 09:54                  | (2) 10:12                   | Manual                  | UV-Vis                  | 4          | 1                | -                                  | -                                          |
| (3) 10:21                       | (3) 10:21                  | (3) 11:02                   | Manual                  | UV-Vis                  | 5          | 1                | -                                  | -                                          |
| (4) 10:21                       | (4) 10:21                  | (4) 11:10                   | Manual                  | UV-Vis                  | 6          | 1                | -                                  | -                                          |
| <b>(5) 12:47</b>                | <b>(5) 13:00</b>           | (5) 14:38                   | Manual                  | Batch Synthesis         | 2          | 1                | React (80 min)                     | 3                                          |
| <b>(6) 12:46</b>                | <b>(6) 12:50</b>           | (6) 13:26                   | Manual                  | UV-Vis                  | 8          | 1                | -                                  | -                                          |
| (7) 14:20                       | (7) 14:20                  | (7) 14:47                   | Manual                  | UV-Vis                  | 6          | 1                | -                                  | -                                          |
| <b>(8) 15:32</b>                | <b>(8) 16:15</b>           | (8) 17:25                   | Manual                  | Batch Synthesis         | 4          | 1                | React (20 min)                     | 2                                          |
| (9) 16:53                       | (9) 16:53                  | (9) 17:11                   | Manual                  | UV-Vis                  | 4          | 1                | -                                  | -                                          |
| (10) 17:34                      | (10) 17:34                 | (10) 18:58                  | Automated (Closed-loop) | Batch Synthesis, UV-Vis | 3          | 1                | React (20 min)                     | 3                                          |

The bold text corresponds to “job waiting time” and the underline text corresponds to “job turnaround time”.

## Supplementary Figure S26. Residual resources-based job split via closed-packing schedule in user-optimal schedulers

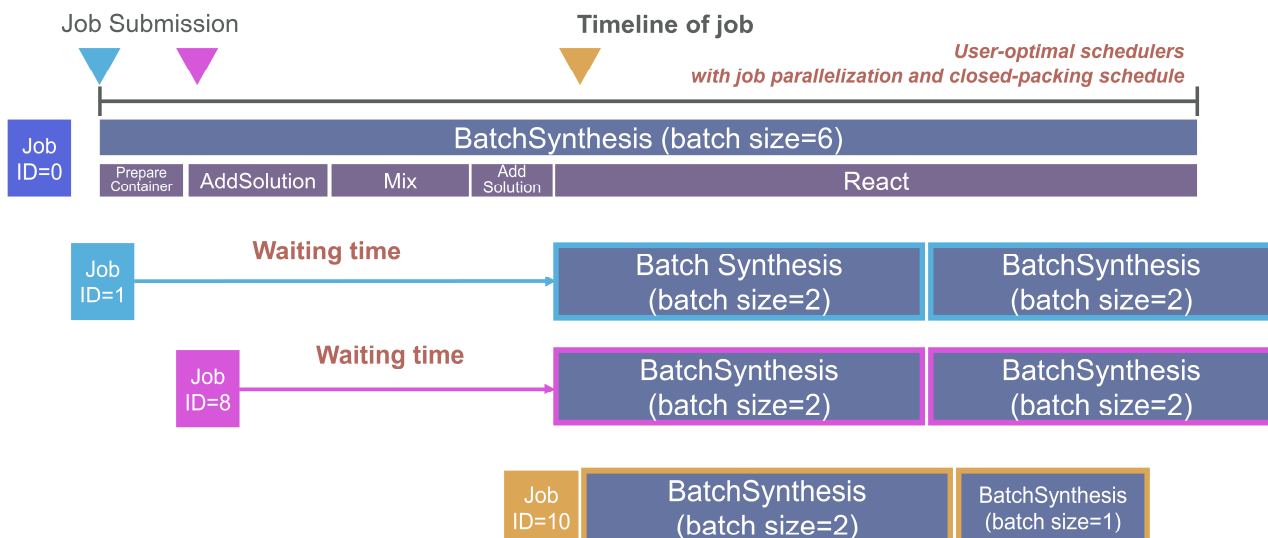

## Supplementary Table S2. Performance test in realistic platform

### Supplementary Table 2a. Result of job waiting time in realistic platform

| Job ID | FCFS (h) | User-Optimal Schedulers (h) |
|--------|----------|-----------------------------|
| 0      | 0        | 0                           |
| 1      | 9.75     | 0.63                        |
| 2      | 11.04    | 0                           |
| 3      | 11.34    | 0                           |
| 4      | 11.72    | 0                           |
| 5      | 12.17    | 0.72                        |
| 6      | 13.81    | 0.07                        |
| 7      | 14.41    | 0                           |
| 8      | 15.16    | 0.72                        |
| 9      | 14.86    | 0                           |
| 10     | 15.92    | 0                           |

### Supplementary Table 2b. Result of job turnaround time in realistic platform

| Job ID | FCFS (h) | User-Optimal Schedulers (h) |
|--------|----------|-----------------------------|
| 0      | 9.75     | 9.75                        |
| 1      | 1.29     | 2.04                        |
| 2      | 0.3      | 0.3                         |
| 3      | 0.38     | 0.68                        |
| 4      | 0.45     | 0.83                        |
| 5      | 1.64     | 1.64                        |
| 6      | 0.6      | 0.6                         |
| 7      | 0.45     | 0.45                        |
| 8      | 0.76     | 1.18                        |
| 9      | 0.3      | 0.3                         |
| 10     | 0.93     | 1.39                        |

**Supplementary Table 2c. Result of job total time in realistic platform**

| <b>Job ID</b> | <b>FCFS (h)</b> | <b>User-Optimal Schedulers (h)</b> |
|---------------|-----------------|------------------------------------|
| 0             | 9.75            | 9.75                               |
| 1             | 11.04           | 2.67                               |
| 2             | 11.34           | 0.3                                |
| 3             | 11.72           | 0.68                               |
| 4             | 12.17           | 0.83                               |
| 5             | 13.81           | 2.36                               |
| 6             | 14.41           | 0.67                               |
| 7             | 14.86           | 0.45                               |
| 8             | 15.92           | 1.89                               |
| 9             | 15.16           | 0.3                                |
| 10            | 16.84           | 1.39                               |

## Supplementary Figure S27. Results of closed packing schedule in UV-Vis module

**A**

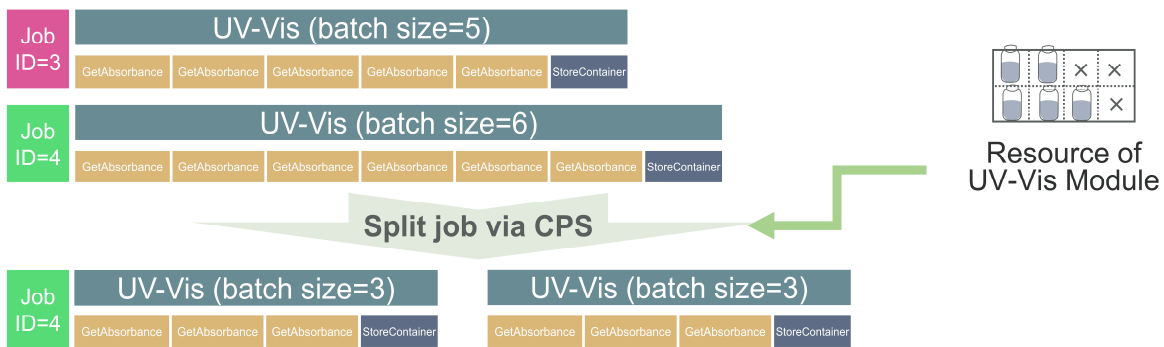

**B**

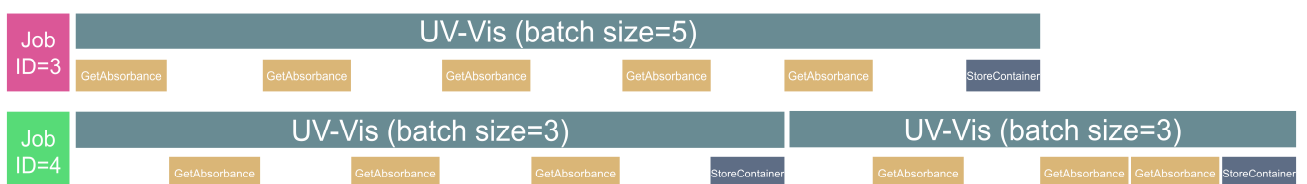

(A) Job split by residual resource-based CPS.

(B) Job parallelization in characterization module without device standby times.



## Supplementary Figure S28. Results of task optimization between batch synthesis and UV-Vis module

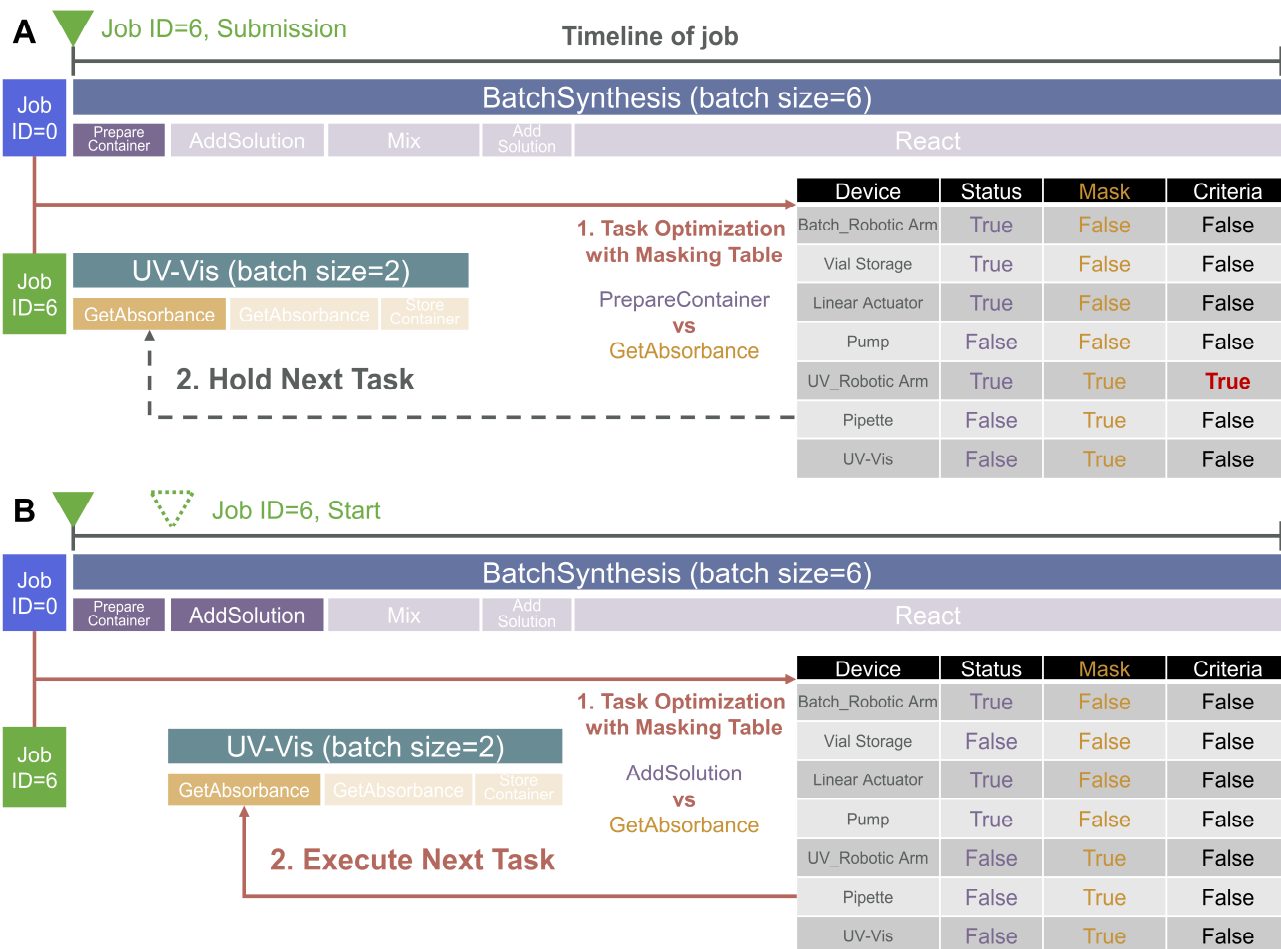

## Supplementary Figure S29. Cause analysis for the delay time of CPS in batch synthesis module

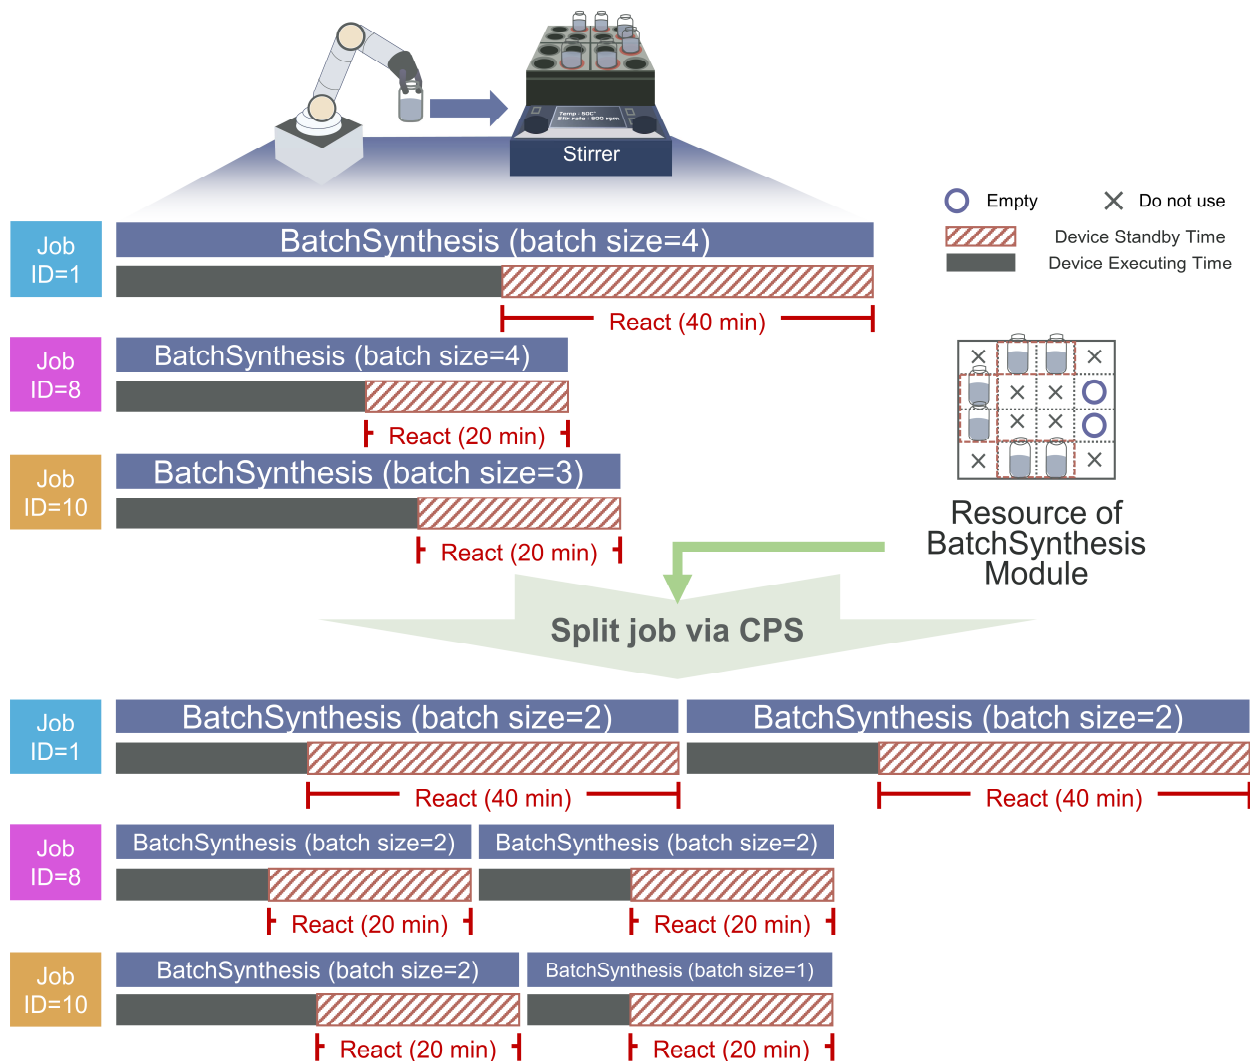

## 9. Copilot of OCTOPUS

### Supplementary Figure S30. Reusability comparison with and without Copilot of OCTOPUS

○ = Reusable  
▲ = Partial modification required  
X = Complete modification required

| Component         | Reusability without Copilot of OCTOPUS | Reusability with Copilot of OCTOPUS  |
|-------------------|----------------------------------------|--------------------------------------|
| Job scheduler     | ○                                      | ○                                    |
| Task generator    | X                                      | ○                                    |
| Task scheduler    | ○                                      | ○                                    |
| Action translator | X                                      | ▲<br>(considered robotic-lab setups) |
| Action executor   | ▲                                      | ○                                    |
| Resource manager  | X                                      | ○                                    |
| Module node       | X                                      | ▲<br>(considered robotic-lab setups) |

**Supplementary Table S3. The description of inputs and outputs of GPT**

| Inputs in GPT prompt              | Outputs as GPT answer                                  |
|-----------------------------------|--------------------------------------------------------|
| Module name                       | Actions of each device in module node or device server |
| All device names in module        |                                                        |
| Module name,                      | Tasks of module                                        |
| Module description                |                                                        |
| Needed task in module information |                                                        |
| Module name                       | Action sequence for task execution                     |
| Generated tasks                   |                                                        |
| Generated actions                 |                                                        |
| Module name                       | Task template and type validation for each task        |
| Generated action sequences        |                                                        |
| Generated tasks                   |                                                        |

## Supplementary Figure S31. Example of action generation for each device in module

### Supplementary Figure S31a. GPT prompt example of action generation for each device in module

```
messages=[
  {
    "role": "system",
    "content": """"You are administrator of autonomous laboratory, which control AI and robotics for chemical experiments,
and your role is the module generation for chemical experiments execution with chemical devices.""",
  },
  {
    "role": "user",
    "content": f""
chemical actions define as "simple word for devices action, not over 2 words", such as stirrer has "stir", "heat", "stop" actions.
"pipette draw" or "move to position" is wrong action name.

please generate actions for controlling chemical devices in {name}, including only {device_str}.
The first letter of the device name must always be capitalized, and for device names containing spaces,
express the delimiter with a capital letter instead of a space..
Don't combine between devices or generate new device name.
For example, when you get "Robot arm" and "Pipette", don't generate "RobotArmPipette".
Please save as python json, and key of json is device name, value of json is action list.
""",
  }
]
```

- ✓ name: module name
- ✓ device\_str: all devices in module

### Supplementary Figure S31b. Example of generated actions for each device via GPT recommendation and client feedback

```
#####
Recommended RobotArmDeviceServer's device action type
#####

+-----+-----+-----+-----+
| idx | RobotArmDeviceServer | action types recommended by GPT |
+-----+-----+-----+-----+
| 1   | RobotArm             | ['Move', 'Rotate', 'Lift', 'Lower', 'Release', 'Grip'] |
| 2   | Pipette              | ['Aspirate', 'Dispense', 'Wash', 'Calibrate', 'EjectTip', 'AttachTip'] |
+-----+-----+-----+-----+

Select the device index you want to modify (enter 'done' to finish, 'back' to return): 1
Do you want to add, modify or delete a task? ('a'/'m'/'d' or 'back' to return): d
Enter the task to delete in RobotArm (or 'back' to return): rotate
Are you sure you want to delete action 'Rotate'? (y/n, 'back' to return): y
Action 'Rotate' deleted from RobotArm.

#####
Recommended RobotArmDeviceServer's device action type
#####

+-----+-----+-----+-----+
| idx | RobotArmDeviceServer | action types recommended by GPT |
+-----+-----+-----+-----+
| 1   | RobotArm             | ['Move', 'Lift', 'Lower', 'Release', 'Grip'] |
| 2   | Pipette              | ['Aspirate', 'Dispense', 'Wash', 'Calibrate', 'EjectTip', 'AttachTip'] |
+-----+-----+-----+-----+

Select the device index you want to modify (enter 'done' to finish, 'back' to return): █
```

## Supplementary Figure S32. Example of task generation for module

### Supplementary Figure S32a. GPT prompt example of task generation for module

```
messages=[
  {
    "role": "system",
    "content": """"You are administrator of autonomous laboratory, which control AI and robotics for chemical experiments,
    and your role is the task generation for chemical experiments execution with chemical devices.""",
  },
  {
    "role": "user",
    "content": f""I am going to define tasks for a module, considering tasks as verbs representing experimental processes.
    For example, the tasks for the BatchSynthesis module include "MoveContainer", "AddSolution", "Stir", "Mix", "React", and "Pipette".
    All task name use verb with module name, such as 'BatchSynthesisModule_Stir', 'RDEEvaluationModule_Dispende
    Now, please suggest tasks for the {input_module_name} as python list, including {task_str}.
    If a specific task involves loading measurement or analysis or performance data, ensure the task name ends with "test".
    {description}.
    """,
  },
],
```

- ✓ input\_module\_name: module name
- ✓ task\_str: need to include task name
- ✓ description: module description

### Supplementary Figure S32b. Example for generated tasks via GPT recommendation and client feedback

```
#####
[Feedback system (task generation)]: current task List
#####
+-----+-----+
| idx | current task name |
+-----+-----+
| 1 | SolidStateModule_LoadPowder |
| 2 | SolidStateModule_AddPowder |
| 3 | SolidStateModule_WeighPowder |
| 4 | SolidStateModule_MixPowders |
| 5 | SolidStateModule_GrindPowder |
| 6 | SolidStateModule_PressPowder |
| 7 | SolidStateModule_Calcine |
| 8 | SolidStateModule_Sinter |
| 9 | SolidStateModule_Cool |
| 10 | SolidStateModule_Characterize |
| 11 | SolidStateModule_XRDtest |
| 12 | SolidStateModule_TGAtest |
| 13 | SolidStateModule_DSCtest |
| 14 | SolidStateModule_BETtest |
| 15 | SolidStateModule_ParticleSizeTest |
| 16 | SolidStateModule_DensityTest |
| 17 | SolidStateModule_PorosityTest |
+-----+-----+
Do you want to add, modify or delete this task? ('a'/'m'/'d') (or 'done' to finish): █
```

## Supplementary Figure S33. Example of the action sequence generation for task execution

### Supplementary Figure S33a. GPT prompt example of action sequence generation for task execution

```
messages=[
  {
    "role": "system",
    "content": """"You are administrator of autonomous laboratory, which control AI and robotics for chemical experiments,
    and your role is to construct action sequence of chemical task, followed by chemical devices and action type of chemical devices.""",
  },
  {
    "role": "user",
    "content": "I have a task list of {}, {}.format(input_module_name, task_list)+
    ""
    The types of chemical tasks we need to perform are listed below:{input_task_list}
    The devices we have and the actions each device can perform are listed below in the form of a dictionary:{input_device_action_dict}
    We called this dictionary, device_action_dictionary.
    The types of devices we have are the keys of the device_action_dictionary.

    Please identify the types of devices needed for each task to perform the chemical tasks.
    Then, create a device_action_dictionary with the task name as the key and a list of strings as the value,
    where each string represents a device and its action concatenated with an underscore "_".
    If there are no devices required for the task, an empty list, [] is used.
    The more detailed the device actions for each task, the higher the accuracy of the task.
    But don't generate new action, just use prior action in {input_device_action_dict}.
    Please save device_action_dictionary as JSON format.
    And, you must remove all annotations in json file.
    """.format(input_task_list=task_list, input_device_action_dict=device_action_dict)
  }
]
```

- ✓ input\_task\_list = generated tasks of module
- ✓ input\_device\_action\_dict = generated actions of devices

| idx | current task name            |
|-----|------------------------------|
| 1   | SolidStateModule_LoadPowder  |
| 2   | SolidStateModule_AddPowder   |
| 3   | SolidStateModule_WeighPowder |
| 4   | SolidStateModule_MixPowers   |
| 5   | SolidStateModule_GrindPowder |
| 6   | SolidStateModule_PressPowder |
| 7   | SolidStateModule_Calcine     |
| 8   | SolidStateModule_Sinter      |
| 9   | SolidStateModule_Cool        |

| device          | action list                                                       |
|-----------------|-------------------------------------------------------------------|
| STIRRER         | ['Heat', 'Stir', 'Stop', 'heartbeat']                             |
| POWDERDISPENSER | ['Dispense', 'Stop', 'heartbeat']                                 |
| WEIGHINGMACHINE | ['Stop', 'Tare', 'Weigh', 'heartbeat']                            |
| HEATER          | ['Cool', 'Heat', 'Stop', 'heartbeat']                             |
| XRD             | ['Align', 'Scan', 'Stop', 'heartbeat']                            |
| ROBOTARM        | ['Grip', 'Move', 'Position', 'Release', 'Rotate', 'heartbeat']    |
| PIPETTE         | ['Aspirate', 'Calibrate', 'Dispense', 'Mix', 'Wash', 'heartbeat'] |
| PUMP            | ['Decrease', 'Increase', 'Reverse', 'Start', 'Stop', 'heartbeat'] |

### Supplementary Figure S33b. Example of generated action sequences for task execution via GPT recommendation and client feedback

```
#####
[Feedback system (match task-->device-action)]: Final Device:Action List
#####
+-----+-----+
| task | device:action list |
+-----+-----+
| SolidStateModule_LoadPowder | ['ROBOTARM_Grip', 'POWDERDISPENSER_Dispense'] |
| SolidStateModule_AddPowder | ['ROBOTARM_Move', 'ROBOTARM_Position', 'ROBOTARM_Grip', 'ROBOTARM_Release'] |
| SolidStateModule_WeighPowder | ['WEIGHINGMACHINE_Tare', 'WEIGHINGMACHINE_Weigh'] |
| SolidStateModule_MixPowers | ['STIRRER_Stir'] |
| SolidStateModule_GrindPowder | ['ROBOTARM_Move', 'ROBOTARM_Position', 'ROBOTARM_Grip', 'ROBOTARM_Release'] |
| SolidStateModule_PressPowder | ['ROBOTARM_Move', 'ROBOTARM_Position', 'ROBOTARM_Grip', 'ROBOTARM_Release'] |
| SolidStateModule_Calcine | ['HEATER_Heat'] |
| SolidStateModule_Sinter | ['HEATER_Heat'] |
| SolidStateModule_Cool | ['HEATER_Cool'] |
+-----+-----+
```



## Supplementary Figure S34. Example of task template and type validation generation

### Supplementary Figure S34a. Prompt engineering of task template generation for type validation using the OpenAI API

#### Role assignment

```
"role": "system",
"content": ""You are administrator of autonomous laboratory, which control AI and robotics for chemical experiments,
and your role is the task template generation for chemical task.""",
```

#### Prompt

```
task_template_prompt="I have a task list of {}, {}.format(input_module_name, task_list)+""
And I need to specify the parameters for executing each task in the form of a dictionary template.
The number of hierarchy levels in template is limited to 3, and I won't create any more levels.
The first level in template will have keys "Task" and "Data", such as {"Task":"","Data":{}}.
The key of second level in template will contain the necessary information for the task.
If some key of second level in template must include a quantitative value, the third level in template must use {"Value":0, "Dimension":""} this format
Dimension must match with the chemical task. For example, AddSolution task should match "µL" or "mL", Press task should match "mPa", "Pa" or "atm".
If some key of second level in template use material, powder, solution or gas, must add "Material" as key and {"Type":""} as value in the second level.
Otherwise, other value of second level in template must include "Value" as key in template, such as {"Type":""}.
If a specific task involves loading measurement, analysis or performance data, must use "Method" as key and {"Type":""} as value in the second level.

More detailed information could increase the reliability of chemical task.
Assign the task template names as variables for each task.
Also, please define all task template without exception in task list.

Define a pydantic class for each task, and don't skip some task, just define all of it.
Finally, you must save task template and pydantic class separately.

if we set task list as BatchSynthesisModule_MoveContainer, BatchSynthesisModule_AddSolution,
BatchSynthesisModule_Stir, BatchSynthesisModule_Heat, BatchSynthesisModule_Mix, BatchSynthesisModule_React,
answer may follow as below example script. Please refer below example code.
```

#### Example implements for few-shot learning

```
**BatchSynthesisModule.json**
python
{
  "BatchSynthesisModule_MoveContainer":{
    "Task":"BatchSynthesisModule_MoveContainer",
    "Data":{
      "FromTo":{"Type":""},
      "Container":{"Type":""},
      "Device":{}
    }
  },
  "BatchSynthesisModule_AddSolution":{
    "Task":"BatchSynthesisModule_AddSolution",
    "Data":{
      "Material":{"Type":""},
      "Volume":{
        "Value":0,"Dimension":"µL"
      },
      "Concentration":{
        "Value":0,"Dimension":"mM"
      },
      "Injectionrate":{
        "Value":0,"Dimension":"µL/s"
      },
      "Device":{}
    }
  },
  "BatchSynthesisModule_Heat":{
    "Task": "BatchSynthesisModule_Heat",
    "Data": {
      "Temperature": {
        "Value": 0,
        "Dimension": "°C"
      },
      "Device":{}
    }
  },
}
```



## Supplementary Figure S34b. Prompt engineering of Pydantic class generation for type validation using the OpenAI API

### Role assignment

```
"role": "system",
"content": """"You are administrator of autonomous laboratory, which control AI and robotics for chemical experiments,
and your role is the Pydantic generation for chemical task.""",
```

### Prompt

```
task_pydantic_prompt=""""Also, define a pydantic class followed by json file, and don't skip some task, just define all of it.
```

```
if we set task list as BatchSynthesisModule_MoveContainer, BatchSynthesisModule_AddSolution,
BatchSynthesisModule_Stir, BatchSynthesisModule_Heat, BatchSynthesisModule_Mix, BatchSynthesisModule_React,
answer may follow as below example script. Please refer below example code.
```

### Examples for few-shot learning

```
**BatchSynthesisModule.py**
```python
from pydantic import BaseModel, Field
from typing import Dict, Any, Optional, Union

class BatchSynthesisModule_MoveContainer_FromTo(BaseModel):
    Type: str = ""

class BatchSynthesisModule_MoveContainer_Container(BaseModel):
    Type: str = ""

class BatchSynthesisModule_AddSolution_Material(BaseModel):
    Type: str = ""

class BatchSynthesisModule_AddSolution_Volume(BaseModel):
    Value: Union[int, float] = 0
    Dimension: str = "µL"

class BatchSynthesisModule_AddSolution_Concentration(BaseModel):
    Value: Union[int, float] = 0
    Dimension: str = "mM"

class BatchSynthesisModule_AddSolution_Injectionrate(BaseModel):
    Value: Union[int, float] = 0
    Dimension: str = "µL/s"

class BatchSynthesisModule_Heat_Temperature(BaseModel):
    Value: Union[int, float] = 0
    Dimension: str = "°C"

class BatchSynthesisModule_Mix_Time(BaseModel):
    Value: Union[int, float] = 0
    Dimension: str = "sec"

class BatchSynthesisModule_Centrifugation_Power(BaseModel):
    Value: Union[int, float] = 0
    Dimension: str = "rpm"

class BatchSynthesisModule_Centrifugation_Time(BaseModel):
    Value: Union[int, float] = 0
    Dimension: str = "sec"
```

```
class BatchSynthesisModule_Centrifugation_Power(BaseModel):
    Value: Union[int, float] = 0
    Dimension: str = "rpm"

class BatchSynthesisModule_Centrifugation_Time(BaseModel):
    Value: Union[int, float] = 0
    Dimension: str = "sec"

class BatchSynthesisModule_Sonication_Power(BaseModel):
    PowValue: Union[int, float] = 0
    Dimension: str = "kHz"

class BatchSynthesisModule_Sonication_Time(BaseModel):
    Value: Union[int, float] = 0
    Dimension: str = "sec"

class BatchSynthesisModule_MoveContainer_Data(BaseModel):
    FromTo: BatchSynthesisModule_MoveContainer_FromTo
    Container: BatchSynthesisModule_MoveContainer_Container
    Device: Dict[str, Any]

class BatchSynthesisModule_AddSolution_Data(BaseModel):
    Material: BatchSynthesisModule_AddSolution_Material
    Volume: BatchSynthesisModule_AddSolution_Volume
    Concentration: BatchSynthesisModule_AddSolution_Concentration
    Injectionrate: BatchSynthesisModule_AddSolution_Injectionrate
    Device: Dict[str, Any]

class BatchSynthesisModule_Heat_Data(BaseModel):
    Temperature: BatchSynthesisModule_Heat_Temperature
    Device: Dict[str, Any]

class BatchSynthesisModule_Mix_Data(BaseModel):
    Time: BatchSynthesisModule_Mix_Time
    Device: Dict[str, Any]

class BatchSynthesisModule_Centrifugation_Data(BaseModel):
    Power: BatchSynthesisModule_Centrifugation_Power
    Time: BatchSynthesisModule_Centrifugation_Time
    Device: Dict[str, Any]
```

# Supplementary Figure S34c. Example of generated task template and type validation for each task

### Tasks

| idx | current task name                 |
|-----|-----------------------------------|
| 1   | SolidStateModule_LoadPowder       |
| 2   | SolidStateModule_AddPowder        |
| 3   | SolidStateModule_WeighPowder      |
| 4   | SolidStateModule_MixPowders       |
| 5   | SolidStateModule_GrindPowder      |
| 6   | SolidStateModule_PressPowder      |
| 7   | SolidStateModule_Calcine          |
| 8   | SolidStateModule_Sinter           |
| 9   | SolidStateModule_Cool             |
| 10  | SolidStateModule_Characterize     |
| 11  | SolidStateModule_XRDtest          |
| 12  | SolidStateModule_TGAtest          |
| 13  | SolidStateModule_DSCtest          |
| 14  | SolidStateModule_BETtest          |
| 15  | SolidStateModule_ParticleSizeTest |
| 16  | SolidStateModule_DensityTest      |
| 17  | SolidStateModule_PorosityTest     |
| 18  | SolidStateModule_MorphologyTest   |

### Task template

```

"SolidStateModule_LoadPowder": {
  "Task": "SolidStateModule_LoadPowder",
  "Data": {
    "Material": "",
    "Quantity": {
      "Value": 0,
      "Dimension": ""
    },
    "Device": {}
  }
},
"SolidStateModule_AddPowder": {
  "Task": "SolidStateModule_AddPowder",
  "Data": {
    "Material": "",
    "Quantity": {
      "Value": 0,
      "Dimension": ""
    },
    "Device": {}
  }
},
"SolidStateModule_WeighPowder": {
  "Task": "SolidStateModule_WeighPowder",
  "Data": {
    "Material": "",
    "TargetWeight": {
      "Value": 0,
      "Dimension": "g"
    },
    "Device": {}
  }
},

```

### Type validation (Task Pydantic)

```

class SolidStateModule_LoadPowder_Data(BaseModel):
    Material: str
    Quantity: SolidStateModule_Quantity
    Device: Dict[str, Any]

class SolidStateModule_AddPowder_Data(BaseModel):
    Material: str
    Quantity: SolidStateModule_Quantity
    Device: Dict[str, Any]

class SolidStateModule_WeighPowder_Data(BaseModel):
    Material: str
    TargetWeight: SolidStateModule_Quantity
    Device: Dict[str, Any]

class SolidStateModule_Quantity(BaseModel):
    Value: Union[int, float] = 0
    Dimension: str

class SolidStateModule_Temperature(BaseModel):
    Value: Union[int, float] = 0
    Dimension: str = "oC"

class SolidStateModule_Time(BaseModel):
    Value: Union[int, float] = 0
    Dimension: str = "sec"

```

**Supplementary Table S4. The result of automated code generation/customization via Copilot of OCTOPUS**

| 1 <sup>st</sup> hierarchy | 2 <sup>nd</sup> hierarchy           | 3 <sup>rd</sup> hierarchy          | Description                                                                     |                                                                                                 |
|---------------------------|-------------------------------------|------------------------------------|---------------------------------------------------------------------------------|-------------------------------------------------------------------------------------------------|
| Action                    | Module                              | {module name}.py                   | Action translator script of module                                              |                                                                                                 |
|                           | routing_table.json                  |                                    | JSON file included IP addresses and port number of each module                  |                                                                                                 |
|                           | ActionExecutor_Class.py             |                                    | Script of action executor                                                       |                                                                                                 |
|                           | ActionTranslator_Class.py           |                                    | Script of action translator                                                     |                                                                                                 |
| Analysis                  | Module                              | {module name}.py                   | Preprocess script for raw spectrum or performance data of each module           |                                                                                                 |
|                           | Analysis.py                         |                                    | Script of analysis method inherited by Module/{module name}.py                  |                                                                                                 |
| Algorithm                 | Manual                              | Manual.py                          | Script of manual experimentation method                                         |                                                                                                 |
|                           | {algorithm name}                    | {algorithm name}.py                | Script of AI for experiment planning                                            |                                                                                                 |
| AutoModuleGeneration      | GPT_answer_generation               | {module name}_actions.txt          | GPT recommendations for actions and tasks generation saved as text files        |                                                                                                 |
|                           | GPT_answer_registration             | {module name}_actionsequence.txt   | GPT recommendations for action sequences saved as text files                    |                                                                                                 |
|                           |                                     | {module name}_task_pydantic.txt    | GPT recommendations for task template generation saved as text files            |                                                                                                 |
|                           |                                     | {module name}_task_template.txt    | GPT recommendations for type validation of task (=Pydantic) saved as text files |                                                                                                 |
|                           | {module name or device server name} | BaseUtils                          | json_func.py                                                                    | Functions for socket communications                                                             |
|                           |                                     |                                    | TCP_Node.py                                                                     | Functions for JSON file read/write                                                              |
|                           |                                     | Log                                | Logging_Class.py                                                                | Logger for recording all actions                                                                |
|                           |                                     | {device_name}                      |                                                                                 | Functions for device controller based on manufacturer's API (Application Programming Interface) |
|                           |                                     | module_node.py or device_server.py |                                                                                 | Interface of module node or device server                                                       |
|                           | DB                                  | DB_Class.py                        |                                                                                 | Script of MongoDB manager                                                                       |
| Job                       | device_standby_time.json            |                                    | JSON file included tasks with long device standby time for each module          |                                                                                                 |
|                           | JobTrigger.py                       |                                    | Script of job trigger                                                           |                                                                                                 |
|                           | JobScheduler.py                     |                                    | Script of job scheduler                                                         |                                                                                                 |
| JobScriptTemplate         | {module name}.json                  |                                    | Template of job script for each module                                          |                                                                                                 |
| Log                       | Logging_Class.py                    |                                    | Script of logger                                                                |                                                                                                 |
| Resource                  | Module                              | {module name}.py                   | Resource allocator for each module                                              |                                                                                                 |
|                           | device_location.json                |                                    | Device resources (location information) for each module                         |                                                                                                 |
|                           | device_status.json                  |                                    | Device status table included all devices for each module                        |                                                                                                 |
|                           | device_masking_table.json           |                                    | Device masking table for all task of each module                                |                                                                                                 |
|                           | ResourcAllocator_Class.py           |                                    | Script of resource allocator inherited by Module/{module name}.py               |                                                                                                 |
|                           | ResourcManager_Class.py             |                                    | Script of resource manager                                                      |                                                                                                 |
| Task                      | ActionSequence                      | {module name}.json                 | JSON file included action sequence of tasks for each module                     |                                                                                                 |
|                           | Pydantic                            | {module name}.py                   | Script of type validation for each module via Pydantic library                  |                                                                                                 |

|                |                        |                    |                                                   |
|----------------|------------------------|--------------------|---------------------------------------------------|
|                | Template               | {module name}.json | JSON file included task templates for each module |
|                | Template_module.json   |                    | JSON file included all module templates           |
|                | TaskGenerator_Class.py |                    | Script of task generator                          |
|                | TaskScheduler_Class.py |                    | Script of task scheduler                          |
| USER           | {client ID}            |                    |                                                   |
| UserManager    | auth0_config.py        |                    | Script of Auth0 configuration for login process   |
|                | UserManager_Class.py   |                    | Script of Auth0 functions for login process       |
| client.py      |                        |                    | Script of client                                  |
| copilot.py     |                        |                    | Script of Copilot of OCTOPUS                      |
| master_node.py |                        |                    | Script of master node                             |

\* {}: the real name of module, ex) {module name}="SolidStateModule"

Purple boxes represent the core software of OCTOPUS. Green boxes indicate the automated code generation for module operation via Copilot of OCTOPUS, which includes functions for module operation. Red boxes represent the JSON file addressing new module information via Copilot of OCTOPUS.

## Supplementary References

- [1] L. Parziale, W. Liu, C. Matthews, N. Rosselot, C. Davis, J. Forrester, D. T. Britt, others, *TCP/IP tutorial and technical overview*, IBM Redbooks, **2006**.
- [2] A. C. Vaucher, F. Zipoli, J. Geluykens, V. H. Nair, P. Schwaller, T. Laino, *Nat. Commun.* **2020**, *11*.
- [3] H. J. Yoo, N. Kim, H. Lee, D. Kim, L. T. C. Ow, H. Nam, C. Kim, S. Y. Lee, K.-Y. Lee, D. Kim, S. S. Han, Bespoke Metal Nanoparticle Synthesis at Room Temperature and Discovery of Chemical Knowledge on Nanoparticle Growth via Autonomous Experimentations. *Adv. Funct. Mater.* **2024**, 2312561. <https://doi.org/10.1002/adfm.202312561>
- [4] NHN Dooray! Corporation, <https://dooray.com/main/service/messenger>.
