# Supplementary material for: OCTOPUS: operation control system for task optimization and job parallelization via a user-optimal scheduler
Source: PubMed Central journal article supplement — Nat Commun. 2024 Nov 8;15:9669. doi: 10.1038/s41467-024-54067-7 (PMC11549402; doi:10.1038/s41467-024-54067-7), 2024-11-08
Supplement: 41467_2024_54067_MOESM2_ESM.pdf [file 41467_2024_54067_MOESM2_ESM.pdf]

## **Description of Additional Supplementary Files**

Supplementary Movie 1: Demonstration of the login process and remote, simultaneous job submissions by two users on the interface node of OCTOPUS.

Supplementary Movie 2: Job parallelization for overlap challenge of modules.

Supplementary Movie 3: Task optimization for overlap challenge of devices.

Supplementary Software: Provides a detailed and step-by-step protocol to assist potential clients in using Copilot of OCTOPUS without difficulty.
